# Supplementary material for: The impact of delaying surgery during the COVID-19 pandemic in Alberta: a qualitative study
Source: PubMed Central journal article supplement — CMAJ Open. 2023 Jan 31;11(1):E90–E100. doi: 10.9778/cmajo.20210330 (PMC9894654; doi:10.9778/cmajo.20210330), 2023-01-31
Supplement: open-2021-0330-2-at.pdf [file open-2021-0330-2-at.pdf]

RE: Confirmation of Consent to Publish Quotations

Dear <Participant>

Thank you for participating in our study on Covid-19 and Surgical Delays. It has come to our attention that our consent form did not specifically state consent for publishing de-identified quotations. As such, we would like to ask if you agree to have your de-identified comments and quotations published (eg. in academic papers, presentations, news releases etc). All quotations included in the manuscript have been de-identified and do not indicate the name, age, sex, or location of any of the participants.

If you could please review the attached information sheet and respond with **“I agree”** or **“I do not agree”** by June 22, 2022 to the following statement:

**The researchers may publish or present documents that contain direct quotations by me, if my name is not published and a made-up name (pseudonym) or identification number is used.**

Thank you again for your time and participation in this important study.

If you have any questions or concerns regarding your participating in the study, please do not hesitate to contact us at 403-210-5463.

Best Regards,

Dr. Khara Sauro

Ethics ID: REB20-0753

Study Title: Surgery during COVID-19: Impact to Rebuilding Capacity

PI: Khara Sauro

Version number/date: V1/June 13, 2022

Page 1 of 1

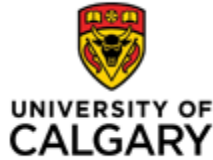

**UNIVERSITY OF CALGARY  
ORAL CONSENT TO PARTICIPATE IN RESEARCH**

“May I please speak with {insert the name of the potential participant here}.”

*If the potential participant is not home, ask if there is a better time to call. Do not leave a message, research participation is confidential.*

*If the potential participant is home, continue with the conversation*

“Hi, {insert the name of the potential participant here} this is {insert your name and role here} calling again from the office of Dr. Khara Sauro. I am calling today to ask if you are still interested in participating in our research study that we are conducting, that we previously discussed. As a reminder, this study looks at the impact that delaying surgeries to make room for COVID-19 patients in hospitals has had on patients, healthcare providers and the healthcare system.”

You were identified as a possible participant in this study because you had your planned surgery delayed during COVID-19. Your participation in a brief interview is voluntary.

The purpose of this research study is to understand how patients who were schedule for surgery, surgical healthcare providers and the healthcare system have been affected by the choice to delay some surgeries to make room for COVID-19 patients in hospitals during the COVID-19 pandemic.

If you agree to participate we will ask you to participate in an interview lasting approximately 30 minutes.

The main potential risk of participating in this study is that you may feel upset when talking about your experience of having your surgery delayed. If this does happen, we have resources for you to access to help you with these feelings. We also encourage you to call your doctor’s office. You are also welcome to stop the interview at any point if it is too much.

We will be audio recording the interview so we can transcribe the interview word for word. When we transcribe the audio recording we will not include your name on the transcription; we only include an identification number that cannot identify you in any way, to make sure the information you provide cannot be attributed to you.. We will delete the audio recording once the information has been transcribed. Only a few members of the research team will have access to the transcription of the interview. The transcription will be kept on a secure server that requires security clearance (two factor authentication) and will be kept for 10 years at which point it will be destroyed. Your healthcare provider(s) will not be made aware of your participation in this study.

Ethics ID: REB20-0753

Study Title: Surgery during COVID-19: Impact to Rebuilding Capacity

PI: Khara Sauro

Version number/date: V4/June 13, 2022

Page 1 of 2

You can withdraw from the study up to one week after data has been collected, after which point data will have been de-identified and entered into a database for analysis and cannot feasibly be attributed to you or withdrawn. If you withdraw from the study within one week of data collection you can choose to have the information collected, removed from the study and/or destroyed.

Quotations from your interview that have been de-identified and cannot be attributed to you may be quoted directly; and all or part of the content of your interview may be used in - academic papers, policy papers or news articles, on the researcher's website or social media, and in other media that we may produce such as spoken presentations.

You may contact Dr. Khara Sauro at 403-210-5463 with any questions or concerns about the research or your participation in this study.

If you have any questions concerning your rights as a participant in this research, please contact the Chair, Conjoint Health Research Ethics Board, University of Calgary at 403-220-7990.

Do you have any questions or would like any additional details?

*Answer any questions the participant may have*

Taking part in this study is your choice. You can choose whether or not you want to participate. Whatever decision you make, there will be no penalty to you. You have a right to have all of your questions answered before deciding whether to take part. Your decision will not affect the medical care you receive. If you decide to take part, you may leave the study at any time.

In no way does your agreement to take part this study waive your legal rights nor release the investigators or involved institutions from their legal and professional responsibilities.

Do you agree to participate in this study?"

*If yes, arrange a time for the interview with the participant.*

*If no, thank the participant for his/her time.*

Ethics ID: REB20-0753

Study Title: Surgery during COVID-19: Impact to Rebuilding Capacity

PI: Khara Sauro

Version number/date: V4/June 13, 2022

Page 2 of 2

**Subject:** Re: Update: Surgery and COVID study  
**Date:** Thursday, June 30, 2022 at 8:43:18 AM Mountain Daylight Time  
**From:** Participant 001  
**To:** Khara Marissa Sauro

[△EXTERNAL]

I agree.

---

**From:** Khara Marissa Sauro <kmsauro@ucalgary.ca>  
**Sent:** June 29, 2022 2:08 PM  
**To:**  
**Subject:** Update: Surgery and COVID study

Dear Participant 001,

Thank you again for participating in our study on COVID-19 and Surgical Delays. It has come to our attention that our consent form did not specifically ask for consent to publish de-identified quotations. As such, we would like to ask if you agree to have your de-identified comments and quotations published (publication includes in academic papers, presentations, news releases, etc.). All quotations included in the manuscript have been de-identified and do not indicate the name, age, sex, or location of any of the participants.

Could you please review the attached information sheet and respond with **“I agree”** or **“I do not agree”** to the following statement: **The researchers may publish or present documents that contain direct quotations by me, if my name is not published and a made-up name (pseudonym) or identification number is used.**

Thank you again for your time and participation in this important study.

If you have any questions or concerns regarding your participating in the study, please do not hesitate to contact us at 403-210-5463.

Best Regards,  
Dr. Khara Sauro

---

**Subject:** Re: Update: Cancelled or postponed surgery study  
**Date:** Wednesday, June 29, 2022 at 3:10:54 PM Mountain Daylight Time  
**From:** Participant 003  
**To:** Khara Marissa Sauro

[△EXTERNAL]

Hi Dr. Sauro,

I agree for you to use my quotes.

On Wed, 29 Jun 2022 at 13:50, Khara Marissa Sauro <[kmsauro@ucalgary.ca](mailto:kmsauro@ucalgary.ca)> wrote:

Dear Participant 003,

Thank you again for participating in our study on COVID-19 and Surgical Delays. It has come to our attention that our consent form did not specifically ask for consent to publish de-identified quotations. As such, we would like to ask if you agree to have your de-identified comments and quotations published (publication includes in academic papers, presentations, news releases, etc.). All quotations included in the manuscript have been de-identified and do not indicate the name, age, sex, or location of any of the participants.

Could you please review the attached information sheet and respond with “**I agree**” or “**I do not agree**” to the following statement: **The researchers may publish or present documents that contain direct quotations by me, if my name is not published and a made-up name (pseudonym) or identification number is used.**

Thank you again for your time and participation in this important study.

If you have any questions or concerns regarding your participating in the study, please do not hesitate to contact us at 403-210-5463.

Best Regards,

Dr. Khara Sauro

---

**Subject:** Re: Update: Surgery during COVID study  
**Date:** Wednesday, June 29, 2022 at 4:33:34 PM Mountain Daylight Time  
**From:** Participant 004  
**To:** Khara Marissa Sauro  
**Attachments:** REB20-0753\_Oral Consent\_patient\_V4\_06132022.docx

[△EXTERNAL]

I agree.

Sincerely,

Sent from my iPad

On Jun 29, 2022, at 14:07, Khara Marissa Sauro <kmsauro@ucalgary.ca> wrote:

Dear Participant 004,

Thank you again for participating in our study on COVID-19 and Surgical Delays. It has come to our attention that our consent form did not specifically ask for consent to publish de-identified quotations. As such, we would like to ask if you agree to have your de-identified comments and quotations published (publication includes in academic papers, presentations, news releases, etc.). All quotations included in the manuscript have been de-identified and do not indicate the name, age, sex, or location of any of the participants.

Could you please review the attached information sheet and respond with **“I agree”** or **“I do not agree”** to the following statement: **The researchers may publish or present documents that contain direct quotations by me, if my name is not published and a made-up name (pseudonym) or identification number is used.**

Thank you again for your time and participation in this important study.

If you have any questions or concerns regarding your participating in the study, please do not hesitate to contact us at 403-210-5463.

Best Regards,  
Dr. Khara Sauro

---

**Subject:** Re: Update: Surgery cancellation  
**Date:** Wednesday, June 29, 2022 at 2:13:39 PM Mountain Daylight Time  
**From:** Participant 005  
**To:** Khara Marissa Sauro  
**Attachments:** REB20-0753\_Oral Consent\_patient\_V4\_06132022.docx

[△EXTERNAL]

I agree

iSent from my iPhone

On Jun 29, 2022, at 2:07 PM, Khara Marissa Sauro <kmsauro@ucalgary.ca> wrote:

Dear Participant 005,

Thank you again for participating in our study on COVID-19 and Surgical Delays. It has come to our attention that our consent form did not specifically ask for consent to publish de-identified quotations. As such, we would like to ask if you agree to have your de-identified comments and quotations published (publication includes in academic papers, presentations, news releases, etc.). All quotations included in the manuscript have been de-identified and do not indicate the name, age, sex, or location of any of the participants.

Could you please review the attached information sheet and respond with **“I agree”** or **“I do not agree”** to the following statement: **The researchers may publish or present documents that contain direct quotations by me, if my name is not published and a made-up name (pseudonym) or identification number is used.**

Thank you again for your time and participation in this important study.

If you have any questions or concerns regarding your participating in the study, please do not hesitate to contact us at 403-210-5463.

Best Regards,  
Dr. Khara Sauro

---

**Subject:** Re: Update: Your current study  
**Date:** Wednesday, June 29, 2022 at 2:30:00 PM Mountain Daylight Time  
**From:** Participant 007  
**To:** Khara Marissa Sauro  
**Attachments:** REB20-0753\_Oral Consent\_patient\_V4\_06132022.docx

[△EXTERNAL]

I agree  
Sent from my iPhone

On Jun 29, 2022, at 2:06 PM, Khara Marissa Sauro <kmsauro@ucalgary.ca> wrote:

Dear Participant 007,

Thank you and your mom again for participating in our study on COVID-19 and Surgical Delays. It has come to our attention that our consent form did not specifically ask for consent to publish de-identified quotations. As such, we would like to ask if you agree to have your de-identified comments and quotations published (publication includes in academic papers, presentations, news releases, etc.). All quotations included in the manuscript have been de-identified and do not indicate the name, age, sex, or location of any of the participants.

Could you please review the attached information sheet and respond with **“I agree”** or **“I do not agree”** to the following statement: **The researchers may publish or present documents that contain direct quotations by me, if my name is not published and a made-up name (pseudonym) or identification number is used.**

Thank you again for your time and participation in this important study.

If you have any questions or concerns regarding your participating in the study, please do not hesitate to contact us at 403-210-5463.

Best Regards,  
Dr. Khara Sauro

---



**Subject:** Re: Update: Delayed Surgery Study  
**Date:** Wednesday, June 29, 2022 at 4:18:48 PM Mountain Daylight Time  
**From:** Participant 008  
**To:** Khara Marissa Sauro  
**Attachments:** REB20-0753\_Oral Consent\_patient\_V4\_06132022.docx

[△EXTERNAL]

I agree.

Sent from my iPhone

On Jun 29, 2022, at 2:01 PM, Khara Marissa Sauro <kmsauro@ucalgary.ca> wrote:

Dear Participant 008,

Thank you again for participating in our study on COVID-19 and Surgical Delays. It has come to our attention that our consent form did not specifically ask for consent to publish de-identified quotations. As such, we would like to ask if you agree to have your de-identified comments and quotations published (publication includes in academic papers, presentations, news releases, etc.). All quotations included in the manuscript have been de-identified and do not indicate the name, age, sex, or location of any of the participants.

Could you please review the attached information sheet and respond with **“I agree”** or **“I do not agree”** to the following statement: **The researchers may publish or present documents that contain direct quotations by me, if my name is not published and a made-up name (pseudonym) or identification number is used.**

Thank you again for your time and participation in this important study.

If you have any questions or concerns regarding your participating in the study, please do not hesitate to contact us at 403-210-5463.

Best Regards,  
Dr. Khara Sauro

---

**Subject:** Re: Update: Impact of Cancelled Surgery Study  
**Date:** Monday, July 4, 2022 at 2:20:08 PM Mountain Daylight Saving Time  
**From:** Participant 009  
**To:** Khara Marissa Sauro  
**Attachments:** REB20-0753\_Oral Consent\_patient\_V4\_06132022.docx

[△EXTERNAL]

Hi Khara,

Apologies for the delayed reply - I agree.

Thanks,

Sent from my iPhone

On Jul 4, 2022, at 12:52 PM, Khara Marissa Sauro <kmsauro@ucalgary.ca> wrote:

Dear Participant 009,

I am just bringing this to the top of your inbox.

I am happy to discuss further if helpful or provide the specific quotes we planned to include.

Thank you,

Khara

---

**From:** Khara Marissa Sauro <kmsauro@ucalgary.ca>

**Date:** Wednesday, June 29, 2022 at 2:04 PM

**To:**

**Subject:** Update: Impact of Cancelled Surgery Study

Dear Participant 009,

Thank you again for participating in our study on COVID-19 and Surgical Delays. It has come to our attention that our consent form did not specifically ask for consent to publish de-identified quotations. As such, we would like to ask if you agree to have your de-identified comments and quotations published (publication includes in academic papers, presentations, news releases, etc.). All quotations included in the manuscript have been de-identified and do not indicate the name, age, sex, or location of any of the participants.

Could you please review the attached information sheet and respond with **“I agree”** or **“I do not**

agree” to the following statement: **The researchers may publish or present documents that contain direct quotations by me, if my name is not published and a made-up name (pseudonym) or identification number is used.**

Thank you again for your time and participation in this important study.

If you have any questions or concerns regarding your participating in the study, please do not hesitate to contact us at 403-210-5463.

Best Regards,  
Dr. Khara Sauro

---

**Subject:** Re: Update: Posting surgery  
**Date:** Wednesday, June 29, 2022 at 3:45:59 PM Mountain Daylight Time  
**From:** Participant 010  
**To:** Khara Marissa Sauro  
**Attachments:** REB20-0753\_Oral Consent\_patient\_V4\_06132022.docx

[△EXTERNAL]

Hi,  
I didn't get the sheet, but I agree.

Sent from my iPad

On Jun 29, 2022, at 2:04 PM, Khara Marissa Sauro <kmsauro@ucalgary.ca> wrote:

Dear Participant 010,

Thank you again for participating in our study on COVID-19 and Surgical Delays. It has come to our attention that our consent form did not specifically ask for consent to publish de-identified quotations. As such, we would like to ask if you agree to have your de-identified comments and quotations published (publication includes in academic papers, presentations, news releases, etc.). All quotations included in the manuscript have been de-identified and do not indicate the name, age, sex, or location of any of the participants.

Could you please review the attached information sheet and respond with **“I agree”** or **“I do not agree”** to the following statement: **The researchers may publish or present documents that contain direct quotations by me, if my name is not published and a made-up name (pseudonym) or identification number is used.**

Thank you again for your time and participation in this important study.

If you have any questions or concerns regarding your participating in the study, please do not hesitate to contact us at 403-210-5463.

Best Regards,  
Dr. Khara Sauro

---

---

**From:** Participant 011  
**Date:** Thursday, June 30, 2022 at 9:41 AM  
**To:** Khara Marissa Sauro <kmsauro@ucalgary.ca>  
**Subject:** Re: Surgical Study

[EXTERNAL]

I agree

Sincerely,

Sent from my iPad

On Jun 29, 2022, at 2:03 PM, Khara Marissa Sauro <kmsauro@ucalgary.ca> wrote:

Dear Participant 011,

Thank you again for participating in our study on COVID-19 and Surgical Delays. It has come to our attention that our consent form did not specifically ask for consent to publish de-identified quotations. As such, we would like to ask if you agree to have your de-identified comments and quotations published (publication includes in academic papers, presentations, news releases, etc.). All quotations included in the manuscript have been de-identified and do not indicate the name, age, sex, or location of any of the participants.

Could you please review the attached information sheet and respond with “I agree” or “I do not agree” to the following statement: **The researchers may publish or present documents that contain direct quotations by me, if my name is not published and a made-up name (pseudonym) or identification number is used.**

Thank you again for your time and participation in this important study.

If you have any questions or concerns regarding your participating in the study, please do not hesitate to contact us at 403-210-5463.

Best Regards,  
Dr. Khara Sauro

---

**Subject:** Re: Update: Surgery delay

**Date:** Wednesday, June 29, 2022 at 2:00:56 PM Mountain Daylight Time

**From:** Participant 012

**To:** Khara Marissa Sauro

[△EXTERNAL]

I agree

On Wed., Jun. 29, 2022, 1:59 p.m. Khara Marissa Sauro, <[kmsauro@ucalgary.ca](mailto:kmsauro@ucalgary.ca)> wrote:

Dear Participant 012,

Thank you again for participating in our study on COVID-19 and Surgical Delays. It has come to our attention that our consent form did not specifically ask for consent to publish de-identified quotations. As such, we would like to ask if you agree to have your de-identified comments and quotations published (publication includes in academic papers, presentations, news releases, etc.). All quotations included in the manuscript have been de-identified and do not indicate the name, age, sex, or location of any of the participants.

Could you please review the attached information sheet and respond with **“I agree”** or **“I do not agree”** to the following statement: **The researchers may publish or present documents that contain direct quotations by me, if my name is not published and a made-up name (pseudonym) or identification number is used.**

Thank you again for your time and participation in this important study.

If you have any questions or concerns regarding your participating in the study, please do not hesitate to contact us at 403-210-5463.

Best Regards,

Dr. Khara Sauro

---

**Subject:** Re: Update: Research determining long-term effects of surgery delays in Alberta  
**Date:** Wednesday, June 29, 2022 at 3:11:05 PM Mountain Daylight Time  
**From:** Participant 014  
**To:** Khara Marissa Sauro  
**Attachments:** REB20-0753\_Oral Consent\_patient\_V4\_06132022.docx

[△EXTERNAL]

Hello Khara,

I agree to the following statement: "The researchers may publish or present documents that contain direct quotations by me, if my name is not published and a made-up name (pseudonym) or identification number is used."

Cheers,

On Jun 29, 2022, at 13:51, Khara Marissa Sauro <kmsauro@ucalgary.ca> wrote:

Dear Participant014,

Thank you again for participating in our study on COVID-19 and Surgical Delays. It has come to our attention that our consent form did not specifically ask for consent to publish de-identified quotations. As such, we would like to ask if you agree to have your de-identified comments and quotations published (publication includes in academic papers, presentations, news releases, etc.). All quotations included in the manuscript have been de-identified and do not indicate the name, age, sex, or location of any of the participants.

Could you please review the attached information sheet and respond with **"I agree"** or **"I do not agree"** to the following statement: **The researchers may publish or present documents that contain direct quotations by me, if my name is not published and a made-up name (pseudonym) or identification number is used.**

Thank you again for your time and participation in this important study.

If you have any questions or concerns regarding your participating in the study, please do not hesitate to contact us at 403-210-5463.

Best Regards,  
Dr. Khara Sauro



**Subject:** Re: Update: Delayed surgery

**Date:** Monday, July 4, 2022 at 1:09:25 PM Mountain Daylight Saving Time

**From:** Participant 015

**To:** Khara Marissa Sauro

[△EXTERNAL]

I agree

On Wed., Jun. 29, 2022, 2:00 p.m. Khara Marissa Sauro, <[kmsauro@ucalgary.ca](mailto:kmsauro@ucalgary.ca)> wrote:

Dear Participant 015,

Thank you again for participating in our study on COVID-19 and Surgical Delays. It has come to our attention that our consent form did not specifically ask for consent to publish de-identified quotations. As such, we would like to ask if you agree to have your de-identified comments and quotations published (publication includes in academic papers, presentations, news releases, etc.). All quotations included in the manuscript have been de-identified and do not indicate the name, age, sex, or location of any of the participants.

Could you please review the attached information sheet and respond with **“I agree”** or **“I do not agree”** to the following statement: **The researchers may publish or present documents that contain direct quotations by me, if my name is not published and a made-up name (pseudonym) or identification number is used.**

Thank you again for your time and participation in this important study.

If you have any questions or concerns regarding your participating in the study, please do not hesitate to contact us at 403-210-5463.

Best Regards,

Dr. Khara Sauro

---
