# Supplementary material for: The impact of delaying surgery during the COVID-19 pandemic in Alberta: a qualitative study
Source: PubMed Central journal article supplement — CMAJ Open. 2023 Jan 31;11(1):E90–E100. doi: 10.9778/cmajo.20210330 (PMC9894654; doi:10.9778/cmajo.20210330), 2023-01-31
Supplement: open-2021-0330-original-submission.pdf [file open-2021-0330-original-submission.pdf]

1  
2  
3 **Title:** “It affects every aspect of your life”: A qualitative study of the impact of delaying surgery  
4 during COVID-19  
5

6  
7 **Authors:** Sauro KM, PhD;<sup>1,2,3</sup> Smith C, MSc;<sup>1</sup> Kersen J, BSc;<sup>1</sup> Schalm E, BKin/BCom;<sup>1,4</sup> Jaworska N,  
8 MD, MSc;<sup>1,4</sup> Roach P, PhD;<sup>1,5</sup> Beesoon S, PhD;<sup>6</sup> Brindle ME, MD<sup>1,2,5</sup>  
9

10  
11 <sup>1</sup> Department of Community of Health Sciences & O’Brien Institute of Public Health, Cumming  
12 School of Medicine, University of Calgary

13 <sup>2</sup> Department of Surgery, Cumming School of Medicine, University of Calgary

14 <sup>3</sup> Department of Oncology & Arnie Charbonneau Cancer Institute, Cumming School of Medicine,  
15 University of Calgary

16 <sup>4</sup> Department of Critical Care Medicine, Cumming School of Medicine, University of Calgary

17 <sup>5</sup> Department of Family Medicine, Cumming School of Medicine, University of Calgary

18 <sup>6</sup> Surgery Strategic Clinical Network, Alberta Health Services, Edmonton, Alberta  
19  
20

21 **Corresponding Author:**

22 Khara Sauro

23 3280 Hospital Dr. NW, Room 3D41

24 Calgary, AB T2N 4Z6

25 Canada

26 403.210.5463

27 [kmsauro@ucalgary.ca](mailto:kmsauro@ucalgary.ca)  
28  
29  
30  
31

32 **Funding Statement:** There is no funding for this work.  
33  
34

35 **Competing Interests:** Authors have no conflicts of interest to declare.  
36  
37  
38  
39  
40  
41  
42  
43  
44  
45  
46  
47  
48  
49  
50  
51  
52  
53  
54  
55  
56  
57  
58  
59  
60

1  
2  
3 **Abstract** (248/250 words)  
4

5 Background: The COVID-19 pandemic has overwhelmed healthcare systems, leading many  
6  
7 jurisdictions to reduce surgical services to create capacity (beds and staff) to care for the surge  
8  
9 of patients with COVID-19. These decisions were made in haste, and little is known about the  
10  
11 impact on patients whose surgery was delayed. This study explores the impact of delaying non-  
12  
13 urgent surgeries on patients, from their perspective.  
14  
15

16  
17 Methods: Using an interpretative description approach, we conducted interviews with adult  
18  
19 patients and their caregivers who had their surgery delayed or cancelled during the COVID-19  
20  
21 pandemic in Alberta, Canada. Trained interviewers conducted semi-structured interviews.  
22  
23 Interviews were iteratively analyzed by two independent reviewers using an inductive approach  
24  
25 to thematic content analysis to understand key elements of the patient experience.  
26  
27  
28

29  
30 Results: We conducted 16 interviews with participants ranging from 27 to 75 years of age with  
31  
32 a variety of surgical procedures delayed. We identified four interconnected themes: individual-  
33  
34 level impacts (physical health, mental health, family and friends, work, quality of life), system-  
35  
36 level factors (healthcare resources, communication, perceived accountability/responsibility),  
37  
38 unique issues related to COVID-19, and uncertainty.  
39  
40

41  
42 Interpretation: The patient-reported impact of having a surgery delayed during the COVID-19  
43  
44 pandemic was diffuse and consequential. While the decision to delay non-urgent surgeries was  
45  
46 made to manage the strain on healthcare systems, our study illustrates the consequences of  
47  
48 these decisions. We advocate for the development and adoption of strategies to mitigate the  
49  
50 burden of distress that waiting for surgery during and after COVID-19 has on patients and their  
51  
52 family/caregivers.  
53  
54  
55  
56  
57  
58  
59  
60

## Introduction

The novel SARS-CoV-2 virus (COVID-19) was declared a pandemic by the World Health Organization (WHO) in March 2020,<sup>(1)</sup> and healthcare systems across the globe braced for a potentially large influx of COVID-19 patients within hospitals. These situations played out in countries such as Italy, where healthcare systems quickly became overwhelmed.<sup>(2)</sup> In light of the impact of the COVID-19 pandemic on healthcare systems globally, many Canadian provinces reallocated healthcare resources to care for COVID-19 patients by reducing surgical capacity. Consequently, a staggering number of non-urgent surgeries (surgeries not immediately threatening life or limb)<sup>(3)</sup> were delayed. For example, early in the COVID-19 pandemic response, Ontario delayed 185,000 surgeries, while the number of delayed surgeries during the fourth wave in Alberta climbed to over 30,000 – a number that continues to increase at the time of writing.<sup>(1, 4-6)</sup> The impact of delaying non-urgent surgeries in Canada has not been fully explored, but it is estimated that the backlog from just the first wave of COVID-19 in some provinces will take 84 weeks to clear.<sup>(6)</sup> Pre-pandemic evidence suggests that excessive surgical wait times can lead to poor physical health, increased anxiety, decreased social interaction and ability to work and overall quality of life.<sup>(7, 8)</sup> Factors that mediate the impact of delays in access to surgical care include patient choice in the delay and communication from healthcare providers.<sup>(7, 8)</sup> It is unclear if these pre-pandemic factors are consistent with the effects of delaying surgery in the context of the COVID-19 pandemic because evidence of the impact of delayed surgeries during COVID-19 is still in its infancy.<sup>(9)</sup> With the continued rise in delayed surgeries understanding the scope of the

1  
2  
3 personal impact on patients and their daily lives is of critical importance. To address this  
4  
5 knowledge gap, the objective of this study is to understand the patient's perspective of having a  
6  
7 surgery delayed during the COVID-19 pandemic response.  
8  
9

## 10 11 12 **Methods**

13  
14  
15 We adopted an interpretative descriptive approach as our methodological framework, which is  
16  
17 aligned with the constructivist and naturalistic orientation of inquiry and aims to understand a  
18  
19 phenomenon grounded in the data within a clinic context to apply the findings.<sup>(10-13)</sup>  
20  
21

22  
23 Participants: We included patients and family/caregivers of patients in Alberta who had their  
24  
25 surgery delayed due to the COVID-19 pandemic response. To date, the Province of Alberta has  
26  
27 experienced four waves of COVID-19; the first wave (March 13, 2020 - early May 2020) resulted  
28  
29 in a reported 30% decrease in surgical capacity, the second and third wave had no strategic  
30  
31 decrease in surgical capacity, and the fourth wave (September 2021 to the time of writing in  
32  
33 November 2021) resulted in all non-urgent surgeries being delayed (only emergent and urgent  
34  
35 surgeries performed) with an estimated 60-70% decrease in surgical capacity.  
36  
37  
38

39  
40  
41 Recruitment and sample selection: Recruitment posters were distributed through social media  
42  
43 (Twitter, Facebook, Instagram) and local news outlets to allow us to reach patients across broad  
44  
45 networks spanning the province of Alberta. Patients with delayed surgeries and their  
46  
47 family/caregivers contacted the Principal Investigator (KMS) via email or phone.  
48  
49

50  
51 Consistent with interpretative descriptive approach, we used a theoretical sampling strategy –  
52  
53 we continued collecting data to achieve a purposive sample of anticipated variations in  
54  
55 response based on age, gender, type of surgery and geographical location.<sup>(11)</sup>  
56  
57  
58

1  
2  
3 Data collection: Ten interviews were anticipated but we continued until we reached saturation  
4  
5 (we no longer identify new themes or novel data) and recruited patients with varied ages,  
6  
7 gender, type of surgery and geographical location.  
8  
9

10  
11 Interviews were conducted by experienced facilitators (CS, JK, ES, NJ). The facilitators were  
12  
13 female graduate students and a research associate with experience in qualitative methods, but  
14  
15 not within the area of surgical care or COVID-19, who volunteered to conduct the interviews.  
16  
17

18 Therefore, there were few assumptions or bias with regards to the results of the study. All  
19  
20 facilitators had formal graduate training in qualitative methods or experiential training in  
21  
22 interview facilitation. The Principal Investigator and facilitators did not have previous  
23  
24 relationships with the participants or their healthcare providers.  
25  
26

27  
28 The experienced facilitator used a semi-structured interview guide with prompts to elicit  
29  
30 emergent ideas while maintaining focus on the topic (Appendix E – Interview Guide). The  
31  
32 interview guide was pilot tested amongst the research team and feedback was solicited from  
33  
34 the senior researcher (MEB) who is a surgeon and leader within the healthcare system.  
35  
36

37  
38 Interviews were conducted virtually (using Zoom® or telephone) due to public health  
39  
40 restrictions in Alberta during data collection, were audio recorded and transcribed. Field notes  
41  
42 were included to clarify context, where appropriate.  
43  
44

45  
46 Data analysis: Data were managed using NVivo 12.0<sup>(14)</sup> and analyzed in keeping with our  
47  
48 interpretive descriptive approach, by two independent reviewers using thematic content  
49  
50 analysis to understand key elements of the patient experience.<sup>(11-13)</sup> An inductive approach was  
51  
52 used so themes were drawn from the data rather than pre-existing sources. Data analysis was  
53  
54  
55  
56  
57  
58  
59  
60

1  
2  
3 iterative whereby the two reviewers coded transcripts, met to compare emerging themes to  
4  
5 ensure rigour of the analytic process. Final themes were determined by consensus among  
6  
7 reviewers. The results were reviewed by the interview facilitators and three participants to  
8  
9 ensure trustworthiness of the findings.  
10  
11  
12

13 This study was approved by the University of Calgary Conjoint Research Ethics Board (REB20-  
14  
15 0753).  
16  
17  
18  
19  
20  
21

## 22 **Results**

23  
24 We conducted 16 interviews between September 20, 2021 and October 8, 2021. The average  
25  
26 length of the interviews was 22 minutes. Demographic characteristics of participants are  
27  
28 described in Table 1. Briefly, the mean age of the participants was 47 years old, with the  
29  
30 majority identifying as women. Most surgeries were scheduled in urban centres and the type of  
31  
32 scheduled surgery varied considerably. Four participants had their surgery completed prior to  
33  
34 the interview while nine did not.  
35  
36  
37  
38  
39  
40  
41

42 Themes: There were four overarching themes that emerged from the data (Figure 1): 1]  
43  
44 individual-level impacts (subthemes: physical health, mental health, family and friend impact,  
45  
46 work impact, quality of life), 2] system-level factors (subthemes: communication, healthcare  
47  
48 resources, perceived accountability/responsibility), 3] COVID-19-related impacts and 4]  
49  
50 uncertainty. Table 2 describes each theme and provides example quotes.  
51  
52  
53  
54

### 55 *1. Individual-level impacts*

56  
57  
58  
59  
60

## 1. 1. Physical Health

Nearly all participants identified ongoing physical health issues related to their delayed surgery. Physical ailments ranged from mild (“The fibroids in my uterus were getting larger and causing me to become more uncomfortable”) to pervasive and debilitating (“I have a very difficult time breathing, I have a very difficult time eating”). Several patients described ongoing physical pain and the effects on their daily lives; from modifications to exercise and activities of daily living, to inability to do one’s job effectively or at all, and prolonged use of pain medication to manage the pain.

Issues around the impact of delayed surgeries on physical health consequently led to impacts on mental health, specifically around worry and anxiety. Uncertainty related to when the surgery would occur, and relief of physical health consequences was also expressed by many participants.

“So, this delay, basically I'm afraid I can have a heart attack or stroke, at any time. So, it's been very stressful on me and my wife as well.”

## 1.2. Mental Health

All participants described an impact on their mental health and was the most discussed theme.

One participant described mental health impacts as their reason for participating in the study:

“I think the biggest reason why I wanted to participate is; just again, it's that emotional toll that it takes on people on a daily basis and I have to assume that the government thought about that, but perhaps they don't realize the actual toll that it takes on all of these other people's lives...”

1  
2  
3 The impacts on mental health ranged from disappointment to depression and anxiety.  
4  
5 Participants expressed a feeling of depression with the delay of surgery and related to  
6  
7 navigating the impacts of the delay. Feeling depressed ranged from passive comments of  
8  
9 feeling low, (e.g., “Right now I'm a little depressed... but I keep telling myself let it go”) to newly  
10  
11 diagnosed depression. Many participants described anxiety and/or worry that was far reaching  
12  
13 and extended beyond physical health (as described above) to concerns about their friends and  
14  
15 family, their work and many aspects of their daily life. Many of these feelings of anxiety and/or  
16  
17 worry were tied to a loss of control and uncertainty around the plans for their surgery, which  
18  
19 are explored in theme four (uncertainty).  
20  
21  
22  
23  
24  
25  
26  
27

### 28 1.3. Family & Friends Impact

29  
30 The impact of delaying surgery extended to family and friends in all cases. This was often  
31  
32 related to requiring extra support with activities of daily living (e.g., housework or cooking) or  
33  
34 emotional support due to physical and mental health challenges directly related to the delayed  
35  
36 surgery. Another commonly described impact was related to social relationships where  
37  
38 participants cancelled social plans and trips to visit family and friends out of fear of missing a  
39  
40 surgery date. Some participants also expressed safety concerns around contracting COVID or  
41  
42 other illness that would compound their existing health issues and prevent them from being  
43  
44 able to have surgery.  
45  
46  
47  
48

49 Several participants also described strains in their relationships outlining that their partners  
50  
51 were stressed and worried about the changes in their physical and mental health which in turn  
52  
53 caused further stress for patients as they waited for surgery. Some participants also described  
54  
55  
56  
57  
58  
59  
60



1  
2  
3 changes to their sexual relationship with their partners because of difficulty with intercourse  
4  
5 because of their unresolved health issues.  
6

#### 7 8 1.4. Work Impact 9

10 Nearly all participants indicated that their delayed surgery directly impacted their professional  
11  
12 life. While some described changes in their ability to work, others disclosed losing their  
13  
14 employment; and for one participant this was described as a significant loss to their identity.  
15  
16

17 The theme of uncertainty re-emerged when discussing the impact on the participants' work life  
18  
19 – participants felt that because of the uncertainty around surgical resumption they were unable  
20  
21 to plan time off for surgery and this would have a downstream impact on work and colleagues.  
22  
23

24 Similarly, participants held-off taking vacation prior to surgery (prior to the cancellation), which  
25  
26 in some cases led to burnout.  
27  
28

29 Other participants noted that they were unable to do their job normally or that they lost  
30  
31 employment due to the physical or mental health impacts of waiting for surgery. This led to  
32  
33 concerns about job security and many endorsed struggles with earning a stable income and  
34  
35 financial stress.  
36  
37

38  
39  
40 "I haven't been able to work as well, which is another factor ... I'm going to lose business  
41  
42 because of this."  
43

44 Conversely, because of flexible, virtual work environments during COVID, some participants  
45  
46 highlighted that this allowed them to be able to continue to work while managing their ongoing  
47  
48 health issues.  
49  
50

#### 51 1.5. Quality of Life 52 53 54 55 56 57 58 59 60

1  
2  
3 For many participants the culmination of impaired physical and/or mental health, strained  
4 social interactions, and employment challenges led to poorer quality of life. Interestingly,  
5  
6 physical impairments were not always a driving factor; some participants commented that  
7  
8 despite being able to physically function, their quality of life still declined. Many patients  
9  
10 described their delayed surgery as having an overarching cloud over their lives.  
11  
12  
13

14  
15 “At home, I feel like I'm extremely distracted. I'm not present, because I'm constantly  
16  
17 thinking about the surgery and the delay. At work, it's a lack of focus, it's a worry about  
18  
19 how it's affecting my coworkers. And there's also the mental exhaustion of not being  
20  
21 able to take time off at work because of it.”  
22  
23  
24

## 25 26 27 28 *2. System-level factors*

29  
30 Participants described several system-level factors primarily revolving around access to and  
31  
32 communication with the healthcare system, including their healthcare providers. Furthermore,  
33  
34 several participants identified sources of accountability and responsibility for handling of  
35  
36 COVID-19 including delayed surgeries and even provided suggestions for how to manage these  
37  
38 delays in the future.  
39  
40

### 41 42 *2.1. Healthcare resources*

43  
44 Several participants indicated that they required additional care or interacted with the  
45  
46 healthcare system, beyond their baseline use, while they were waiting for surgery. This  
47  
48 included more frequent visits with their primary care physician (including virtual care visits),  
49  
50 consultation with psychologists, regular visits (every four weeks) to change a catheter, regular  
51  
52 visits with a gastroenterologist for ileostomy including a day surgery and visits to the  
53  
54  
55  
56  
57  
58  
59  
60

1  
2  
3 emergency department. Some participants expressed less healthcare use due to concerns  
4  
5 around contracting COVID-19 in physician offices or hospitals.  
6  
7  
8  
9

## 10 2.2. Communication

11  
12 Discussion around communication focused primarily on communication with their healthcare  
13  
14 providers, specifically how and by whom the delay was communicated. Participants' viewed  
15  
16 communication as equally positive and negative overall. Negative comments were largely  
17  
18 related to short notice of the delay and lack of information when communicating the delay.  
19  
20 Participants who perceived communication to be negative expressed more anger and  
21  
22 frustration. Conversely, many participants felt they were given sufficient notice about the delay  
23  
24 and praised their healthcare providers for their communication. Participants who reported  
25  
26 positive communication indicated that they received timely communication directly from their  
27  
28 healthcare provider (surgeon or surgery clinic rather than the healthcare system) who  
29  
30 demonstrated regret and concern for the patient.  
31  
32  
33  
34  
35  
36

37 There were also some concerns raised about communication by the government and media.  
38  
39 Specifically, some participants raised concerns that the government and healthcare system  
40  
41 communication categorized these surgeries as "elective"; voicing that although their condition  
42  
43 may not be immediately life threatening, it was life-altering, and their surgery was far from  
44  
45 "elective".  
46  
47  
48

## 49 2.3. Perceived Accountability/Responsibility

50  
51 When participants were asked what could have been done differently to minimize the impact of  
52  
53 the COVID-19 response on surgery patients, discussion frequently deviated to anger and/or  
54  
55  
56  
57  
58  
59  
60

1  
2  
3 frustration about the current situation; specifically, the high number of COVID-19 cases  
4  
5 necessitating surge capacity in our hospitals and the resulting decision to delay surgeries.  
6  
7

8 One participant summarized the overall sentiment of most participants: “I understand it, but I  
9  
10 don't like it”. Anger and frustration with the current situation was frequently associated with  
11  
12 uncertainty.  
13  
14

15 However, other sources of anger and/or frustration were related to responsibility for the  
16  
17 COVID-19 situation in our province. Participants frequently cited the government’s handling of  
18  
19 the COVID-19 pandemic as the reason for having to delay surgeries. There were also strong  
20  
21 feelings of divide towards people who have chosen not to get the vaccine.  
22  
23

24  
25 “...surgeries have been delayed, cancer treatments have been delayed. All that with a  
26  
27 vaccine on the table. Well, the last thing I checked there wasn't a vaccine for cancer, so  
28  
29 why is someone missing a cancer treatment when the person with COVID who didn't get  
30  
31 immunized.”  
32  
33

34  
35 Despite negative views about the current situation, including delaying surgeries, there were  
36  
37 also sentiments of understanding, especially regarding the decision to delay surgeries during  
38  
39 the first wave of COVID-19 when less was known about the trajectory of COVID-19 and when  
40  
41 vaccines were not available.  
42  
43

### 44 45 46 47 *3. COVID-19-related impacts* 48

49 Participants highlighted unique factors related to COVID-19 that complicated their delayed  
50  
51 surgery experience. Protecting and maintaining one’s health and isolation were two common  
52  
53 threads around COVID-19 impacts.  
54  
55  
56  
57  
58  
59  
60

1  
2  
3 Participants expressed concern or challenges with accessing healthcare services due to COVID-  
4  
5 19 but there were also some advantages to accessing care during COVID-19 with the advent of  
6  
7 virtual care. Some participants indicated hesitation in accessing in-person healthcare for fear of  
8  
9 acquiring COVID-19 in public places. Similarly, the fear of contracting COVID-19 or other  
10  
11 illnesses in their vulnerable condition was a great concern. The fear was twofold; they were  
12  
13 fearful of becoming severely ill but also fearful of further surgical delays if they were to become  
14  
15 ill at a time when a surgery date became available. Their fear of becoming ill resulted in physical  
16  
17 isolation and consequently psychological isolation for many participants. Moreover, their poor  
18  
19 mental health also made socialization (virtual or in-person) more challenging.  
20  
21  
22  
23  
24  
25  
26  
27  
28

#### 29 *4. Uncertainty*

30  
31 Uncertainty about health and surgery resumption had a large impact on participants. All  
32  
33 participants found the uncertainty surrounding their surgery and physical health was pervasive  
34  
35 and impacted many aspects of their life. Uncertainty was described as a loss of control and lack  
36  
37 of information about surgery and underlying health. One participant described this loss of  
38  
39 control as “being held hostage to what's happening in the hospital; like...total limbo”.  
40  
41  
42  
43

44 In addition to feelings of uncertainty resulting from the perception of loss of control and being  
45  
46 uninformed, uncertainty was also described as a reason for poor mental health. This association  
47  
48 was rooted in feelings of anxiety and/or worry about the unknown consequences of delaying  
49  
50 surgery on their physical health and uncertainty about the future.  
51  
52  
53  
54  
55  
56  
57  
58  
59  
60

1  
2  
3 Uncertainty resulted in poor mental health but also logistic challenges in several areas of life.  
4  
5 For example, uncertainty impacted planning time off work for surgery and the subsequent  
6  
7 recovery. As well, it impacted the participant's ability to commit to social activities, engage in  
8  
9 family planning and pursue post-secondary education. Uncertainty frequently led to discussion  
10  
11 about the impact of the delayed surgery on friends and family and their professional lives.  
12  
13  
14  
15  
16  
17

### 18 **Interpretation**

19  
20  
21 Our study found that the impact of delaying surgeries to manage the surge of COVID-19  
22  
23 patients was diffuse and consequential on the lives of patients. Four interconnected themes  
24  
25 emerged: 1] individual-level impacts (subthemes: physical health, mental health, family and  
26  
27 friend impact, work impact, quality of life), 2] system-level factors (subthemes: communication,  
28  
29 healthcare resources, perceived accountability/responsibility), 3] COVID-19-related impacts and  
30  
31 4] uncertainty (Figure 2).  
32  
33  
34  
35

36 The physical effect of delaying surgery has been illustrated in the pre-pandemic setting.  
37  
38 Exceeding optimal interval from diagnosis to surgery has been associated with poor outcomes  
39  
40 in many diseases.<sup>(7, 8, 15-17)</sup> For example, delayed cancer surgery results in poor disease-free  
41  
42 survival,<sup>(17-19)</sup> and patients with delayed cardiac surgery experience greater morbidity and  
43  
44 mortality, longer hospitalizations, and are more likely to die post-operatively.<sup>(20, 21)</sup> Delaying  
45  
46 surgeries considered less urgent, is associated with an increase cost to patients (e.g., increased  
47  
48 pain, decreased quality of life) and the healthcare system.<sup>(22-26)</sup> Our study confirmed that  
49  
50 perceived physical health was compromised due to the delays in surgery; however, the physical  
51  
52  
53  
54  
55  
56  
57  
58  
59  
60

1  
2  
3 impact was less prominent and perhaps the driver of more significant effects on participants'  
4  
5 mental health and quality of life.  
6  
7  
8  
9

10  
11 Distress among patients waiting for surgery has been previously described, however there is a  
12  
13 need for additional research on the burden of delayed surgeries during COVID-19 given the  
14  
15 unique and unprecedented nature of surgical delays during the pandemic.<sup>(27)</sup> A recent study of  
16  
17 patients waiting for cancer surgery due to COVID-19 capacity limits reported similar findings to  
18  
19 ours; participants had high levels of distress, stress, anxiety and depression.<sup>(9)</sup> The similarity  
20  
21 between our findings and those of Forner et al.,<sup>(9)</sup> despite few cancer surgery participants in our  
22  
23 study suggests the experience of waiting for surgery during COVID-19 is similar across surgeries.  
24  
25  
26 We hypothesize the unifying characteristic among patients waiting for any type of surgery  
27  
28 during COVID-19 is uncertainty; specifically, the unpredictability of the COVID-19 pandemic and  
29  
30 response. Uncertainty was a prominent theme that arose in our study and many participants  
31  
32 underlined the connection between the uncertainty and the distress and burden this placed on  
33  
34 all aspects of their lives. Minimizing uncertainty is challenging in the context of COVID-19  
35  
36 because the pandemic has been, in and of itself, unpredictable. Our findings highlight that  
37  
38 timely, personalized, pragmatic, and compassionate communication is needed and may  
39  
40 minimize distress in patients waiting for surgery, even if certainty cannot be provided.<sup>(27-29)</sup>  
41  
42  
43 *Moving forward.* Managing surgical waitlists and transforming surgical care is important to  
44  
45 mitigate the backlog of surgeries due to the response to COVID-19. Approaches to decrease  
46  
47 wait time and increase efficiency of surgical care to create more capacity, and increase quality,  
48  
49 have been proposed.<sup>(30-32)</sup> However, focus on improving the surgery waiting period could  
50  
51  
52  
53  
54  
55  
56  
57  
58  
59  
60

1  
2  
3 minimize the impact of delaying surgery during and after the COVID-19 pandemic. The waiting  
4  
5 period is fraught with consequences to patients' physical and mental health.<sup>(7)</sup> Based on our  
6  
7 findings, interventions that support patient mental health are needed during surgery waiting  
8  
9 periods. Studies suggest that strategies such as educating patients about the potential mental  
10  
11 health consequences of waiting for surgery, regular communication with healthcare providers  
12  
13 and mental health support (e.g., self-management approaches and peer-support) could  
14  
15 improve the impact of surgical delays on patients' mental health.<sup>(27)</sup> Our findings support the  
16  
17 need and potential utility of these strategies but future research needed to explore the critical  
18  
19 components for successful strategies and their implementation.  
20  
21  
22  
23  
24  
25

26 *Strengths and limitations.* While this study has several strengths (data collection continued  
27  
28 after we reached thematic saturation to ensure a broad perspective of a varied patient sample,  
29  
30 we used iterative member checking, we captured patient perspectives from diverse  
31  
32 backgrounds and clinical areas and our team engaged in peer debriefing during analysis) our  
33  
34 findings should be interpreted with limitations in mind. Participants were limited to a single  
35  
36 province, during the largest wave of the COVID-19 which may differ from the unique experience  
37  
38 with COVID-19 of each province.  
39  
40  
41  
42

43 *Conclusion.* During the ongoing COVID-19 pandemic, healthcare systems have had to make  
44  
45 difficult decisions with little evidence. While healthcare system decision-makers anticipated the  
46  
47 impact of delaying surgeries on patients, they had little choice due to strained healthcare  
48  
49 resources. Our findings illustrate the direct and substantial impact delaying surgery has on  
50  
51 patients. The interplay between the themes identified in our study suggests it is important to  
52  
53 consider all these factors when measuring and developing strategies to mitigate the impact of  
54  
55  
56  
57  
58  
59  
60



1  
2  
3 delaying surgery. Investments in mental health, occupational and social supports with clear,  
4  
5 personalized, and compassionate communication strategies during periods of delay could  
6  
7 address all these factors and should be explored to improve surgical care during the ongoing  
8  
9 COVID-19 pandemic and beyond.  
10  
11  
12  
13  
14  
15  
16  
17  
18  
19  
20  
21  
22  
23  
24  
25  
26  
27  
28  
29  
30  
31  
32  
33  
34  
35  
36  
37  
38  
39  
40  
41  
42  
43  
44  
45  
46  
47  
48  
49  
50  
51  
52  
53  
54  
55  
56  
57  
58  
59  
60

Confidential

## References

1. Geneva, Switzerland: World Health Organization; [Available from: [https://www.who.int/emergencies/diseases/novel-coronavirus-2019/interactive-timeline?gclid=Cj0KCQjw5oiMBhDtARIsAJi0qk2rozzTB4QiPygy20qQDFmw\\_ULgGDYd7Qj9QX60FvlgQA6aVu-iKkkaAttTEALw\\_wcB#event-115](https://www.who.int/emergencies/diseases/novel-coronavirus-2019/interactive-timeline?gclid=Cj0KCQjw5oiMBhDtARIsAJi0qk2rozzTB4QiPygy20qQDFmw_ULgGDYd7Qj9QX60FvlgQA6aVu-iKkkaAttTEALw_wcB#event-115)].
2. Valenza F, Papagni G, Marchianò A, Daidone MG, DeBraud F, Colombo MP, et al. Response of a comprehensive cancer center to the COVID-19 pandemic: the experience of the Fondazione IRCCS-Istituto Nazionale dei Tumori di Milano. *Tumori*. 2020;300891620923790.
3. Prin M, Guglielminotti J, Mtalimanja O, Li G, Charles A. Emergency-to-Elective Surgery Ratio: A Global Indicator of Access to Surgical Care. *World J Surg*. 2018;42(7):1971-80.
4. Ademola A, Dort J, Nakoneshny S, Brindle M, Robert J, Litvinchuk S, et al. The impact of delaying non-urgent surgery during wave one of COVID-19: a retrospective cohort study. Submitted to *CMAJ Open*. 2021.
5. Tam DY, Naimark D, Sander B, Barrett K, Khan YA, Mac S, et al. COVID-19: Predicting consequences of curtailing outpatient scheduled cardiac procedures in the face of COVID healthcare resource needs in Ontario. 2020.
6. Wang J, Vahid S, Eberg M, Milroy S, Milkovich J, Wright FC, et al. Clearing the surgical backlog caused by COVID-19 in Ontario: a time series modelling study. *Canadian Medical Association Journal*. 2020;cmaj.201521.
7. Oudhoff JP, Timmermans DRM, Knol DL, Bijnen AB, van der Wal G. Waiting for elective general surgery: impact on health related quality of life and psychosocial consequences. *BMC Public Health*. 2007;7:164-.
8. Carr T, Teucher U, Mann J, Casson AG. Waiting for surgery from the patient perspective. *Psychol Res Behav Manag*. 2009;2:107-19.
9. Forner D, Murnaghan S, Porter G, Mason RJ, Hong P, Taylor SM, et al. Psychosocial Distress in Adult Patients Awaiting Cancer Surgery during the COVID-19 Pandemic. *Current Oncology*. 2021;28(3):1867-78.
10. Hunt MR. Strengths and Challenges in the Use of Interpretive Description: Reflections Arising From a Study of the Moral Experience of Health Professionals in Humanitarian Work. *Qualitative Health Research*. 2009;19(9):1284-92.
11. Thorne S, Kirkham SR, MacDonald-Emes J. Interpretive description: A noncategorical qualitative alternative for developing nursing knowledge. *Research in Nursing & Health*. 1997;20(2):169-77.
12. Thorne S, Kirkham SR, O'Flynn-Magee K. The analytic challenge in interpretive description. *International journal of qualitative methods*. 2004;3(1):1-11.
13. Thorne S. *Qualitative Research for Applied Practice*. Second Edition ed. London, UK: Routledge; 2016 2016.
14. NVivo 12.0. QSR International; 2021.
15. Zhao F, Qi N, Zhang C, Xue N, Li S, Zhou R, et al. Impact of Surgical Wait Time on Survival in Patients With Upper Urinary Tract Urothelial Carcinoma With Hydronephrosis. *Front Oncol*. 2021;11:698594.

16. Pincus D, Ravi B, Wasserstein D, Huang A, Paterson JM, Nathens AB, et al. Association Between Wait Time and 30-Day Mortality in Adults Undergoing Hip Fracture Surgery. *JAMA*. 2017;318(20):1994-2003.
17. Deidda S, Elmore U, Rosati R, De Nardi P, Vignali A, Puccetti F, et al. Association of Delayed Surgery With Oncologic Long-term Outcomes in Patients With Locally Advanced Rectal Cancer Not Responding to Preoperative Chemoradiation. *JAMA Surg*. 2021.
18. Heiden BT, Eaton DB, Jr., Engelhardt KE, Chang SH, Yan Y, Patel MR, et al. Analysis of Delayed Surgical Treatment and Oncologic Outcomes in Clinical Stage I Non-Small Cell Lung Cancer. *JAMA Netw Open*. 2021;4(5):e2111613.
19. Matsuo K, Shimada M, Matsuzaki S, Enomoto T, Mikami M. Wait-time for adjuvant radiotherapy and oncologic outcome in early-stage cervical cancer: A treatment implication during the coronavirus pandemic. *Eur J Cancer*. 2021;148:117-20.
20. Mohamed MO, Banerjee A, Clarke S, de Belder M, Patwala A, Goodwin AT, et al. Impact of COVID-19 on cardiac procedure activity in England and associated 30-day mortality. *Eur Heart J Qual Care Clin Outcomes*. 2021;7(3):247-56.
21. Rexus H, Brandrup-Wognsen G, Odén A, Jeppsson A. Mortality on the waiting list for coronary artery bypass grafting: incidence and risk factors. *Ann Thorac Surg*. 2004;77(3):769-74; discussion 74-5.
22. Traylor J, Koelper N, Kim SW, Sammel MD, Andy UU. Impact of Surgical Wait Time to Hysterectomy for Benign Gynecologic Disease. *J Minim Invasive Gynecol*. 2021;28(5):982-90.
23. Elit LM, O'Leary EM, Pond GR, Seow HY. Impact of wait times on survival for women with uterine cancer. *J Clin Oncol*. 2014;32(1):27-33.
24. Berger A, Bozic K, Stacey B, Edelsberg J, Sadosky A, Oster G. Patterns of pharmacotherapy and health care utilization and costs prior to total hip or total knee replacement in patients with osteoarthritis. *Arthritis Rheum*. 2011;63(8):2268-75.
25. Mather RC, 3rd, Hug KT, Orlando LA, Watters TS, Koenig L, Nunley RM, et al. Economic evaluation of access to musculoskeletal care: the case of waiting for total knee arthroplasty. *BMC Musculoskelet Disord*. 2014;15:22.
26. Snider MG, MacDonald SJ, Pototschnik R. Waiting times and patient perspectives for total hip and knee arthroplasty in rural and urban Ontario. *Can J Surg*. 2005;48(5):355-60.
27. Gagliardi AR, Yip CYY, Irish J, Wright FC, Rubin B, Ross H, et al. The psychological burden of waiting for procedures and patient-centred strategies that could support the mental health of wait-listed patients and caregivers during the COVID-19 pandemic: A scoping review. *Health Expect*. 2021;24(3):978-90.
28. Howe LS, Wigmore D, Nelms N, Schottel P, Bartlett C, Halsey D, et al. Perioperative Family Updates Reduce Anxiety and Improve Satisfaction: A Randomized Controlled Trial. *J Patient Cent Res Rev*. 2021;8(2):107-12.
29. Hartlief GA, Niemeijer AS, Lamberts KF, Nieuwenhuis MK. The impact of early information concerning the surgical operations on anxiety in patients with burns. *Burns*. 2021;47(4):847-53.
30. Urbach DR, Martin D. Confronting the COVID-19 surgery crisis: time for transformational change. *Canadian Medical Association Journal*. 2020;192(21):E585-E6.

- 1
  - 2
  - 3
  - 4
  - 5
  - 6
  - 7
  - 8
  - 9
  - 10
  - 11
  - 12
  - 13
  - 14
  - 15
  - 16
  - 17
  - 18
  - 19
  - 20
  - 21
  - 22
  - 23
  - 24
  - 25
  - 26
  - 27
  - 28
  - 29
  - 30
  - 31
  - 32
  - 33
  - 34
  - 35
  - 36
  - 37
  - 38
  - 39
  - 40
  - 41
  - 42
  - 43
  - 44
  - 45
  - 46
  - 47
  - 48
  - 49
  - 50
  - 51
  - 52
  - 53
  - 54
  - 55
  - 56
  - 57
  - 58
  - 59
  - 60
31. Kasivisvanathan R, Tilney HS, Jhanji S, O'Mahony M, Gruber P, Nicol D, et al. The 'hub and spoke model' for the management of surgical patients during the COVID-19 pandemic. *Int J Health Plann Manage.* 2021;36(5):1397-406.
32. Ljungqvist O, Nelson G, Demartines N. The Post COVID-19 Surgical Backlog: Now is the Time to Implement Enhanced Recovery After Surgery (ERAS). *World J Surg.* 2020;44(10):3197-8.

Confidential

**Table 1.** Participant characteristics

| <b>Participant</b> | <b>Age</b> | <b>Gender</b> | <b>Residence (AHS Zone)</b> | <b>Surgery location</b> | <b>Type of surgery</b>           | <b>Initial date</b>                | <b>Surgery date</b> | <b>Notes</b>                                         |
|--------------------|------------|---------------|-----------------------------|-------------------------|----------------------------------|------------------------------------|---------------------|------------------------------------------------------|
| <b>001</b>         | 41         | Woman         | Calgary Zone                | Calgary                 | Biopsy (suspected non-cancerous) | Mid-September 2021                 | NA                  | No new date                                          |
| <b>002</b>         | 68         | Man           | Edmonton Zone               | Edmonton                | Prostate surgery (non-cancer)    | Mid-April 2020                     | June 2020           | Given sufficient notice                              |
| <b>003</b>         | 27         | Non-binary    | Calgary Zone                | Calgary                 | Gender reallocation              | Mid-May 2020                       | June 2020           | Got in earlier due to a cancellation and day surgery |
| <b>004</b>         | 40         | Woman         | Edmonton Zone               | Edmonton                | Gynecologic                      | Decision to treat date: April 2020 | September 2021      | No date given after consult due to surgery delays    |
| <b>005</b>         | 44         | Woman         | Calgary Zone                | Community hospital      | Gynecologic                      | October 2021                       | NA                  | No date or timeline – at least 6 weeks               |
| <b>006</b>         | 65         | Man           | Calgary Zone                | Calgary                 | Cardiac                          | September 2021                     | NA                  |                                                      |
| <b>007A</b>        | 48         | Man           | Calgary Zone                | NA                      | Orthopedic                       | NA                                 | NA                  | Son of patient (007B)                                |
| <b>007B</b>        | 75         | Woman         | Calgary Zone                | NA                      | Orthopedic                       | NA                                 | NA                  | Waiting for surgery                                  |

1  
2  
3  
4  
5  
6  
7  
8  
9  
10  
11  
12  
13  
14  
15  
16  
17  
18  
19  
20  
21  
22  
23  
24  
25  
26  
27  
28  
29  
30  
31  
32  
33  
34  
35  
36  
37  
38  
39  
40  
41  
42  
43  
44  
45  
46  
47

|            |    |       |               |                    |                                |                                                                 |                        |                                                                                              |                                                |
|------------|----|-------|---------------|--------------------|--------------------------------|-----------------------------------------------------------------|------------------------|----------------------------------------------------------------------------------------------|------------------------------------------------|
|            |    |       |               |                    |                                |                                                                 |                        |                                                                                              | consult for hip replacement but not date given |
| <b>008</b> | 33 | Woman | Edmonton Zone | Community hospital | Orthopedic                     | August 2020 – delayed until October 2021                        | NA                     | No new date for October cancellation.                                                        |                                                |
| <b>009</b> | 31 | Woman | Calgary Zone  | Calgary            | Gynecologic                    | September 2021                                                  | NA                     | No new date                                                                                  |                                                |
| <b>010</b> | 49 | Woman | Edmonton Zone | Edmonton           | 1) Endocrine<br>2) Gynecologic | 1) July 2021 delayed until September, 2021<br>2) September 2021 | NA                     | Patient had done pre-op and was cancelled for an urgent case.                                |                                                |
| <b>011</b> | 54 | Woman | Edmonton Zone | Edmonton           | Gastrointestinal               | March 2020 Followed by subsequent surgery November 2020         | July,2020 & March 2021 | One day notice of cancellation for first surgery and hours notice for cancellation of second |                                                |
| <b>012</b> | 47 | Woman | Edmonton Zone | Edmonton           | Gynecologic                    | September 2021                                                  | NA                     |                                                                                              |                                                |

|    |            |    |       |              |         |                  |           |    |              |
|----|------------|----|-------|--------------|---------|------------------|-----------|----|--------------|
| 1  |            |    |       |              |         |                  |           |    |              |
| 2  |            |    |       |              |         |                  |           |    |              |
| 3  | <b>013</b> | 39 | Man   | Calgary Zone | Calgary | Neurosurgery     | September | NA | 5 days       |
| 4  |            |    |       |              |         |                  | 2021      |    | notice of    |
| 5  |            |    |       |              |         |                  |           |    | cancellation |
| 6  |            |    |       |              |         |                  |           |    |              |
| 7  | <b>014</b> | 40 | Woman | Calgary Zone | Calgary | Gastrointestinal | September | NA | 2 days       |
| 8  |            |    |       |              |         |                  | 2021      |    | notice of    |
| 9  |            |    |       |              |         |                  |           |    | cancellation |
| 10 |            |    |       |              |         |                  |           |    |              |
| 11 | <b>015</b> | 52 | Man   | South Zone   | Calgary | Orthopedic       | October   | NA | Anticipated  |
| 12 |            |    |       |              |         |                  | 2021      |    | date of      |
| 13 |            |    |       |              |         |                  |           |    | November     |
| 14 |            |    |       |              |         |                  |           |    | 2021         |

Abbreviations: AHS=Alberta Health Services; NA=Not Applicable

Confidential

1  
2  
3  
4  
5  
6  
7  
8  
9  
10  
11  
12  
13  
14  
15  
16  
17  
18  
19  
20  
21  
22  
23  
24  
25  
26  
27  
28  
29  
30  
31  
32  
33  
34  
35  
36  
37  
38  
39  
40  
41  
42  
43  
44  
45  
46  
47

Confidential





1  
2  
3  
4  
5  
6  
7  
8  
9  
10  
11  
12  
13  
14  
15  
16  
17  
18  
19  
20  
21  
22  
23  
24  
25  
26  
27  
28  
29  
30  
31  
32  
33  
34  
35  
36  
37  
38  
39  
40  
41  
42  
43  
44  
45  
46  
47

**Table 2.** Themes and quotes

| Theme                    | Subtheme        | Descriptive codes | Exemplar quote                                                                                                                                                                                                                                                                                                                                                                             |
|--------------------------|-----------------|-------------------|--------------------------------------------------------------------------------------------------------------------------------------------------------------------------------------------------------------------------------------------------------------------------------------------------------------------------------------------------------------------------------------------|
| INDIVIDUAL-LEVEL IMPACTS | Physical Health | Pain              | "...but you can see the pain on her face when she sits at the table, or whatever, and now she spends as much time lying in bed off her legs and her hip." [Participant 7A]                                                                                                                                                                                                                 |
|                          |                 | Discomfort        |                                                                                                                                                                                                                                                                                                                                                                                            |
|                          |                 | Quality of Life   |                                                                                                                                                                                                                                                                                                                                                                                            |
|                          |                 | Worry             | "It seems like I'm getting...my breath is getting shorter. I get tired quicker it seems." [Participant 6]                                                                                                                                                                                                                                                                                  |
|                          |                 |                   | "This wasn't like you know, a health lifesaving surgery so it's been it was fine. Like my fibro [fibromyalgia] probably got worse because of stress." [Participant 3]                                                                                                                                                                                                                      |
|                          |                 |                   | "...it's pretty hard for the ones that are waiting like myself included, it yeah kind of it would be nice to get done because everyday pain; I mean a lot of pain." [Participant 7B]                                                                                                                                                                                                       |
|                          |                 |                   | "I'm now on pain medication every day. Yep. At the moment, I don't do a whole lot because it hurts too much. [Participant 15]                                                                                                                                                                                                                                                              |
|                          |                 |                   | "I mean, the obvious [impact] is the continued pain. So, what I'm sort of dealing with on a sort of weekly basis is I'm not sure what causes it, but I'll get a sharp onset of pain in my abdomen just below my ribs... So, it makes it hard and painful to inhale deeply. So, I find myself short of breath even in with simple tasks like climbing a flight of stairs." [Participant 14] |

|    |      |              |                                                                                                |
|----|------|--------------|------------------------------------------------------------------------------------------------|
| 1  |      |              |                                                                                                |
| 2  |      |              |                                                                                                |
| 3  |      | Depression   | "It's been a challenge more from the mental health side of things." [Participant 1]            |
| 4  |      | Anxiety      |                                                                                                |
| 5  |      | Worry        |                                                                                                |
| 6  |      | Frustration  | "It's been a lot of mental strain, because I know the extra is going to be put on the          |
| 7  |      | Anger        | people at work. And my limited activity at home and just the mental stress of having           |
| 8  |      | Independence | surgery, period. And then the ups and downs of watching the news to see how bad it's           |
| 9  |      | Isolation    | getting, and if it might get canceled. And then the relief of having a surgery date, and       |
| 10 |      | Uncertainty  | then the immediate crushing that it was canceled. So, it's been an extremely emotional         |
| 11 |      |              | toll on me." [Participant 9]                                                                   |
| 12 |      |              |                                                                                                |
| 13 |      |              |                                                                                                |
| 14 |      |              | "I mean just kind of like bummed me out. I've got body dysphoria; so having boobs was          |
| 15 |      |              | just lousy." [Participant 3]                                                                   |
| 16 |      |              |                                                                                                |
| 17 |      |              |                                                                                                |
| 18 |      |              | "In August I had a panic attack....and talked to the doctor there and anyway, since that       |
| 19 |      |              | time I've been extremely; I have been quite calm OK...And then they cancel my surgery          |
| 20 |      |              | so that stress level went up again." [Participant 6]                                           |
| 21 |      |              |                                                                                                |
| 22 |      |              |                                                                                                |
| 23 |      |              | "...and again, like I know for me like it's not so much of an impact in a physical sense, so   |
| 24 |      |              | like in that case no. But, again, the emotional toll makes me sometimes not want to do         |
| 25 |      |              | anything." [Participant 9]                                                                     |
| 26 |      |              |                                                                                                |
| 27 |      |              |                                                                                                |
| 28 |      |              | "And we were able to stop and control the prolapse but every day waiting for that flap         |
| 29 |      |              | surgery, and every day waiting for the reversal. I held my breath that my intestine would      |
| 30 |      |              | not truly fall out of my body." [Participant 11]                                               |
| 31 |      |              |                                                                                                |
| 32 |      |              |                                                                                                |
| 33 |      |              | "So, there's kind of the stress over that, the stress over wondering if I do have to delay     |
| 34 |      |              | till April. Obviously, there's a risk that a gallstone can get stuck and cause a lot worse     |
| 35 |      |              | problems. So, there's that stress." [Participant 14]                                           |
| 36 |      |              |                                                                                                |
| 37 |      |              |                                                                                                |
| 38 |      |              | "So this delay basically I'm afraid I can have a heart attack or stroke, at any time. So, it's |
| 39 |      |              | been very stressful on me and my wife as well." [Participant 6]                                |
| 40 | INDI | Mental       |                                                                                                |
| 41 | VID  | Health       |                                                                                                |
| 42 | UAL  |              |                                                                                                |
| 43 |      |              |                                                                                                |
| 44 |      |              |                                                                                                |
| 45 |      |              |                                                                                                |
| 46 |      |              |                                                                                                |
| 47 |      |              |                                                                                                |

1  
2  
3  
4  
5  
6  
7  
8  
9  
10  
11  
12  
13  
14  
15  
16  
17  
18  
19  
20  
21  
22  
23  
24  
25  
26  
27  
28  
29  
30  
31  
32  
33  
34  
35  
36  
37  
38  
39  
40  
41  
42  
43  
44  
45  
46  
47

|  |                                                                                                                                                                                                                                                                                                                                                                                                                                                                                                                                                                                                                                                                                                                                                                                                                                                                                                                                                            |
|--|------------------------------------------------------------------------------------------------------------------------------------------------------------------------------------------------------------------------------------------------------------------------------------------------------------------------------------------------------------------------------------------------------------------------------------------------------------------------------------------------------------------------------------------------------------------------------------------------------------------------------------------------------------------------------------------------------------------------------------------------------------------------------------------------------------------------------------------------------------------------------------------------------------------------------------------------------------|
|  | <p>“I did contact my surgeon's office to find out how much notice I would get ahead of when the surgery was re-booked, because I have arthritis that's autoimmune. And so of course, when your stress levels go up, the arthritis tends to flare.” [Participant 14]</p> <p>“You worry all the time. You worry about what could happen, what might happen, why it isn't happening. So, there's a lot of depression and anxiety involved.” [Participant 12]</p> <p>“I'm going to be diagnosed with depression and I think it was ultimately a result of the delay because you're so excited you're counting down the days and then like I said just to be told a week before that after you've been waiting for so long that it's not happening, and you don't know when it's happening like that loss of control and all of those unknowns...Just like on a mental health toll it's impacted my day to day, and wanting to make plans.”[Participant 10]</p> |
|--|------------------------------------------------------------------------------------------------------------------------------------------------------------------------------------------------------------------------------------------------------------------------------------------------------------------------------------------------------------------------------------------------------------------------------------------------------------------------------------------------------------------------------------------------------------------------------------------------------------------------------------------------------------------------------------------------------------------------------------------------------------------------------------------------------------------------------------------------------------------------------------------------------------------------------------------------------------|

Confidential

|                          |                                                                                                                                                                                                                                                                                                                                                                                                                                                                                                                                                                                                                                                                                                                                                                                                                                                                                                                                                                                                                                                                                                                                                                                                                                                                                                                                                                                                                                                                                                                                                                                                                                                                                                                                                                                                                                                                                                                                                                                                                                                                                                                                                                                                                                                                                                       |
|--------------------------|-------------------------------------------------------------------------------------------------------------------------------------------------------------------------------------------------------------------------------------------------------------------------------------------------------------------------------------------------------------------------------------------------------------------------------------------------------------------------------------------------------------------------------------------------------------------------------------------------------------------------------------------------------------------------------------------------------------------------------------------------------------------------------------------------------------------------------------------------------------------------------------------------------------------------------------------------------------------------------------------------------------------------------------------------------------------------------------------------------------------------------------------------------------------------------------------------------------------------------------------------------------------------------------------------------------------------------------------------------------------------------------------------------------------------------------------------------------------------------------------------------------------------------------------------------------------------------------------------------------------------------------------------------------------------------------------------------------------------------------------------------------------------------------------------------------------------------------------------------------------------------------------------------------------------------------------------------------------------------------------------------------------------------------------------------------------------------------------------------------------------------------------------------------------------------------------------------------------------------------------------------------------------------------------------------|
| INDIVIDUAL-LEVEL IMPACTS | <p data-bbox="388 602 420 906"><b>Family &amp; friend impact</b></p> <p data-bbox="506 199 695 305">Isolation<br/>Independence<br/>Burden</p> <p data-bbox="747 199 1801 345">“But it tells you, it shows you the stress. That my constant surgeries and the postponement because of Covid That my child could see how crucial this was. a teenager. <i>Interviewer: Yeah, it impacts the entire family?</i> Oh, to just an extreme.” [Participant 11]</p> <p data-bbox="747 394 1892 540">“So he [participant’s father] ended up just like rejigging his schedule looks like he'll take a different day of work, whenever this actually happens. So, it was just like very stressful for a lot of people who had kind of like tried to reorganize their life around me.” [Participant 3]</p> <p data-bbox="747 589 1892 816">“At this point, my son, this is what I really want to stress, this wasn't just me. I have a 16 [year old son]. He's a competitive athlete ... and he made the choice to pull out of his training, even COVID-safe because at this point, we're two weeks before my surgery and if anyone's exposed to COVID I'm not going. So, my whole house shut down. We isolated and shut down completely. So, when you talk about socialization it wasn't just mine, I had a teenager and a home that it affected.” [Participant 11]</p> <p data-bbox="747 865 1864 1044">“Socialization and relationships that didn't really... well... apart from in my marriage, I guess. I don't know if fibroids, if they were affecting my hormone levels. But I did decrease my libido so probably had an impact on my marriage as I was waiting. Not I don't know how you think it's not something you could quantify but that's just a sense that I got a change that I sensed in myself.” [Participant 4]</p> <p data-bbox="747 1092 1881 1271">“Like I’m fortunate, I have a really good husband at home, but I’ve definitely had to rely on him more like even some days it's hard to want to make dinner, for example, just because it's so emotionally tolling. So yeah he's definitely had to step up. and I’ve definitely relied on friends and family, a lot more, and just talking about everything and more detail, sometimes I feel like a broken record.” [Participant 9]</p> |
|--------------------------|-------------------------------------------------------------------------------------------------------------------------------------------------------------------------------------------------------------------------------------------------------------------------------------------------------------------------------------------------------------------------------------------------------------------------------------------------------------------------------------------------------------------------------------------------------------------------------------------------------------------------------------------------------------------------------------------------------------------------------------------------------------------------------------------------------------------------------------------------------------------------------------------------------------------------------------------------------------------------------------------------------------------------------------------------------------------------------------------------------------------------------------------------------------------------------------------------------------------------------------------------------------------------------------------------------------------------------------------------------------------------------------------------------------------------------------------------------------------------------------------------------------------------------------------------------------------------------------------------------------------------------------------------------------------------------------------------------------------------------------------------------------------------------------------------------------------------------------------------------------------------------------------------------------------------------------------------------------------------------------------------------------------------------------------------------------------------------------------------------------------------------------------------------------------------------------------------------------------------------------------------------------------------------------------------------|

1  
2  
3  
4  
5  
6  
7  
8  
9  
10  
11  
12  
13  
14  
15  
16  
17  
18  
19  
20  
21  
22  
23  
24  
25  
26  
27  
28  
29  
30  
31  
32  
33  
34  
35  
36  
37  
38  
39  
40  
41  
42  
43  
44  
45  
46  
47

|                          |             |                                                                         |                                                                                                                                                                                                                                                                                                                                                                                                                                                                                                                                                                                                                                                                                                                                                                                                                                                                                                                                                                                                                                                                                                                                                                                                                                                                                                                                                                                                                                                                                                                                                                                                                                                                                                                                                                                                                                                                                                                                                                                                                                  |
|--------------------------|-------------|-------------------------------------------------------------------------|----------------------------------------------------------------------------------------------------------------------------------------------------------------------------------------------------------------------------------------------------------------------------------------------------------------------------------------------------------------------------------------------------------------------------------------------------------------------------------------------------------------------------------------------------------------------------------------------------------------------------------------------------------------------------------------------------------------------------------------------------------------------------------------------------------------------------------------------------------------------------------------------------------------------------------------------------------------------------------------------------------------------------------------------------------------------------------------------------------------------------------------------------------------------------------------------------------------------------------------------------------------------------------------------------------------------------------------------------------------------------------------------------------------------------------------------------------------------------------------------------------------------------------------------------------------------------------------------------------------------------------------------------------------------------------------------------------------------------------------------------------------------------------------------------------------------------------------------------------------------------------------------------------------------------------------------------------------------------------------------------------------------------------|
| INDIVIDUAL-LEVEL IMPACTS | Work Impact | <p>Income<br/>Responsibility<br/>Identity<br/>Burden<br/>Insecurity</p> | <p>“I also have to worry about where I is my income coming in, I have to make sure that my mortgage is paid, my bills are paid and I can't be irresponsible because I don't want to suffer. I don't want to suffer due to the fact that COVID and the lack of surgeries and what's happening is going to affect me in the future, because it will.” [Participant 10]</p> <p>“I have to miss more work because I'm now going to massage therapy once a week and for deep tissue and then physiotherapy. I'm still on modified work duty for my last failed surgery of this. So that continues my work doesn't know exactly when I'm going to be gone now.” [Participant 15]</p> <p>“Yeah. I do find work challenging, especially with Zoom-type interaction. The project that I'm working on right now has expanded to a lot of new people across Canada. And so I have fairly frequent interactions with new people, and I get to see the shock on people's faces with how I come across. And that's definitely hard to see.” [Participant 13]</p> <p>“My job is quite physical, lifting relatively heavy things. So I've had to ask for others help with those types of tasks, which is another mental health thing because I don't like imposing on other people, and I don't like feeling incompetent.” [Participant 14]</p> <p>“For me, how it affected me was I couldn't go back to work. I was waiting like because of the surgeries I wasn't well enough. I was constantly waiting. Like for all care, even just support when you have a new appliance, COVID, it affects all of that. When you can't go into proper clinics, when you know there's just, it just affected every element. And at this point now, I find myself not employed, because at some point. Your employers have to move on.” [Participant 11]</p> <p>“Fortunately, I'm able to work from home most days and so when I'm not feeling well, I can kind of step away for my for my work and just kind of focus on me for a bit.” [Participant 9]</p> |
|--------------------------|-------------|-------------------------------------------------------------------------|----------------------------------------------------------------------------------------------------------------------------------------------------------------------------------------------------------------------------------------------------------------------------------------------------------------------------------------------------------------------------------------------------------------------------------------------------------------------------------------------------------------------------------------------------------------------------------------------------------------------------------------------------------------------------------------------------------------------------------------------------------------------------------------------------------------------------------------------------------------------------------------------------------------------------------------------------------------------------------------------------------------------------------------------------------------------------------------------------------------------------------------------------------------------------------------------------------------------------------------------------------------------------------------------------------------------------------------------------------------------------------------------------------------------------------------------------------------------------------------------------------------------------------------------------------------------------------------------------------------------------------------------------------------------------------------------------------------------------------------------------------------------------------------------------------------------------------------------------------------------------------------------------------------------------------------------------------------------------------------------------------------------------------|

|                                                                                               |                                                                                                                                                                                                                                                                                                                                                                                                                                                                                                                                                                                                                                                                                                                                                                                                                                                                                                                                                                                                                                                                                                                                                                                                                                                                                                                                                                                                                                                                                                                                                                                                                                                                                                                                                                                                                                                                                                                                                                                |
|-----------------------------------------------------------------------------------------------|--------------------------------------------------------------------------------------------------------------------------------------------------------------------------------------------------------------------------------------------------------------------------------------------------------------------------------------------------------------------------------------------------------------------------------------------------------------------------------------------------------------------------------------------------------------------------------------------------------------------------------------------------------------------------------------------------------------------------------------------------------------------------------------------------------------------------------------------------------------------------------------------------------------------------------------------------------------------------------------------------------------------------------------------------------------------------------------------------------------------------------------------------------------------------------------------------------------------------------------------------------------------------------------------------------------------------------------------------------------------------------------------------------------------------------------------------------------------------------------------------------------------------------------------------------------------------------------------------------------------------------------------------------------------------------------------------------------------------------------------------------------------------------------------------------------------------------------------------------------------------------------------------------------------------------------------------------------------------------|
| <p style="writing-mode: vertical-rl; transform: rotate(180deg);">INDIVIDUAL-LEVEL IMPACTS</p> | <p style="writing-mode: vertical-rl; transform: rotate(180deg);">Quality of Life</p> <p>Physical health<br/>Mental health</p> <p>“For that so from a health perspective it's it's been pretty extreme the delays. Right and you remember within those time periods. When you're having surgeries that rely upon one successful successful completion to move to that next stage, to try and move you through Former through those yep through those periods, it affects your nutrition, it affects your sleep, it affects every aspect of your life.” [Participant 11]</p> <p>“I think there's a line, of course, between life and death. And then there's a line between a quality of life, where a person is still affected daily. And I think that is just as important as the life and death.” [Participant 12]</p> <p>“But I did decrease my libido so probably had an impact on my marriage as I was waiting. Not I don't know how you think it's not something you could quantify but that's just a sense that I got a change that I sensed in myself. So that was difficult.” [Participant 4]</p> <p>“I mean I’m functioning, but I spend a lot of time on the couch, right.” [Participant 6]</p> <p>“I have been, I’m not myself by no means. I used to be very active. I’m not as reliable as I once was; I’m canceling on things constantly because either a) I’ve lost my voice, b) I’m in so much pain I can't lift anything.” [Participant 10]</p> <p>[referring to a deformity of their skull as a result of a previous cancer surgery that the delayed surgery was supposed to fix] “But I work from home right now, and it's definitely difficult to interact with people on a professional level, with how I look. And I don't feel comfortable leaving the house, to be honest.” [Participant 13]</p> <p>“Yeah. It's not urgent, it's not life threatening. It's just, it's quality of life. It really just impacts me at the moment.” [Participant 15]</p> |
|                                                                                               |                                                                                                                                                                                                                                                                                                                                                                                                                                                                                                                                                                                                                                                                                                                                                                                                                                                                                                                                                                                                                                                                                                                                                                                                                                                                                                                                                                                                                                                                                                                                                                                                                                                                                                                                                                                                                                                                                                                                                                                |

1  
2  
3  
4  
5  
6  
7  
8  
9  
10  
11  
12  
13  
14  
15  
16  
17  
18  
19  
20  
21  
22  
23  
24  
25  
26  
27  
28  
29  
30  
31  
32  
33  
34  
35  
36  
37  
38  
39  
40  
41  
42  
43  
44  
45  
46  
47

|                             |                                                                                                                                                                                                                                                                                                                                                                                                                                                                                                                                                                                                                                                                                                                                                                                                                                                                                                                                                                                                                                                                                                                                                                                                                                                                                                                                                                                                      |
|-----------------------------|------------------------------------------------------------------------------------------------------------------------------------------------------------------------------------------------------------------------------------------------------------------------------------------------------------------------------------------------------------------------------------------------------------------------------------------------------------------------------------------------------------------------------------------------------------------------------------------------------------------------------------------------------------------------------------------------------------------------------------------------------------------------------------------------------------------------------------------------------------------------------------------------------------------------------------------------------------------------------------------------------------------------------------------------------------------------------------------------------------------------------------------------------------------------------------------------------------------------------------------------------------------------------------------------------------------------------------------------------------------------------------------------------|
| <b>SYSTEM-LEVEL FACTORS</b> | <div data-bbox="388 397 420 690" style="text-align: center; vertical-align: middle;"><b>Healthcare Resources</b></div> <div data-bbox="493 194 640 267"> <p>Access<br/>Hesitancy</p> </div> <div data-bbox="745 194 1890 852"> <p>“Yeah, the only thing that I had to do, which was continuous since I had the catheter first put in, was going every four weeks and have it changed... The only thing that changed on that, is that the health unit out here, instead of me going to them, they came to my home to change the catheter.” [Participant 2]</p> <p>“I had a conversation with my doctor, but she just did it over the phone, rather than making me go into the office. I just talked to her about that it is delayed, and you know that I would continue to take pain medication for it, but I have not had to visit any emergency room because of it.” [Participant 8]</p> <p>“I did have an incident where I should...could have gone in but I just decided not to. And yeah, just the waiting around in the emergencies just driving me crazy.” [Participant 10]</p> <p>“And once I was able to walk and talk, they wheeled me out into a hallway in the neuro ward. And I spent two weeks outside of a room, in a hallway at [hospital]. That was pretty uncomfortable. I've definitely seen what the effects of lack of bed availability looks like.” [Participant 13]</p> </div> |
|-----------------------------|------------------------------------------------------------------------------------------------------------------------------------------------------------------------------------------------------------------------------------------------------------------------------------------------------------------------------------------------------------------------------------------------------------------------------------------------------------------------------------------------------------------------------------------------------------------------------------------------------------------------------------------------------------------------------------------------------------------------------------------------------------------------------------------------------------------------------------------------------------------------------------------------------------------------------------------------------------------------------------------------------------------------------------------------------------------------------------------------------------------------------------------------------------------------------------------------------------------------------------------------------------------------------------------------------------------------------------------------------------------------------------------------------|



|                      |                                                                                                                                                                                                                                                                                                                                                                                                                                                                                                                                                                                                                                                                                                                                                                                                                                                                                                                                                                                                                                                                                                                                                                                                                                                                                                                                                                                                                                                                                                                                                                                                                                                                                                  |
|----------------------|--------------------------------------------------------------------------------------------------------------------------------------------------------------------------------------------------------------------------------------------------------------------------------------------------------------------------------------------------------------------------------------------------------------------------------------------------------------------------------------------------------------------------------------------------------------------------------------------------------------------------------------------------------------------------------------------------------------------------------------------------------------------------------------------------------------------------------------------------------------------------------------------------------------------------------------------------------------------------------------------------------------------------------------------------------------------------------------------------------------------------------------------------------------------------------------------------------------------------------------------------------------------------------------------------------------------------------------------------------------------------------------------------------------------------------------------------------------------------------------------------------------------------------------------------------------------------------------------------------------------------------------------------------------------------------------------------|
| SYSTEM-LEVEL FACTORS | <p data-bbox="388 446 420 714"><b>Healthcare provider</b></p> <p data-bbox="504 203 714 308">Access<br/>Communication<br/>Responsibility</p> <p data-bbox="745 203 1890 381">“I don't know about the avoiding delay, but I do definitely think it's a system and set a cutoff time. For example, if we are a-go as of 2:00 PM the day before surgery, we're not going to cancel it. In other words, not waiting until the last minute to cancel and have a cutoff time the day before. So at least that person isn't scared to go into the hospital the next morning and being afraid they're going to be kicked back out.” [Participant 12]</p> <p data-bbox="745 430 1858 576">“They just said, “We'll just have to wait. We've got no idea what a realistic timeline is, and we'll keep you updated. So, I really have no expectations to hearing from them, until they know more. And I don't really have expectations of things getting better anytime soon.” [Participant 13]</p> <p data-bbox="745 625 1890 771">“When the surgery was canceled, I didn't think to ask, but I also was not instructed what to do in terms of if I'm experiencing particular symptoms, whether that means I should go to the ER, that kind of thing. So, I've just been suffering through it on my own, I guess.” [Participant 14]</p> <p data-bbox="745 820 1890 966">“Well, I did receive notification in a timely manner, so it didn't affect me in terms of any preparation, which, if they had done it on the spur of the moment, give me a day notice or something like that, it would've been different. I think I had at least a week's notice when they canceled my surgery.” [Participant 2]</p> |
|----------------------|--------------------------------------------------------------------------------------------------------------------------------------------------------------------------------------------------------------------------------------------------------------------------------------------------------------------------------------------------------------------------------------------------------------------------------------------------------------------------------------------------------------------------------------------------------------------------------------------------------------------------------------------------------------------------------------------------------------------------------------------------------------------------------------------------------------------------------------------------------------------------------------------------------------------------------------------------------------------------------------------------------------------------------------------------------------------------------------------------------------------------------------------------------------------------------------------------------------------------------------------------------------------------------------------------------------------------------------------------------------------------------------------------------------------------------------------------------------------------------------------------------------------------------------------------------------------------------------------------------------------------------------------------------------------------------------------------|

1  
2  
3  
4  
5  
6  
7  
8  
9  
10  
11  
12  
13  
14  
15  
16  
17  
18  
19  
20  
21  
22  
23  
24  
25  
26  
27  
28  
29  
30  
31  
32  
33  
34  
35  
36  
37  
38  
39  
40  
41  
42  
43  
44  
45  
46  
47

|                             |                      |                                                                                                                                                                                                                                                                                                                                                                                                                                                                                                                                                                                                                                                                                                                                                                                                                                                                                                                                                                                                                                                                                                                                                                                                                                                                                                                                                                                                                                                                                                                                                                                                                                                                                        |
|-----------------------------|----------------------|----------------------------------------------------------------------------------------------------------------------------------------------------------------------------------------------------------------------------------------------------------------------------------------------------------------------------------------------------------------------------------------------------------------------------------------------------------------------------------------------------------------------------------------------------------------------------------------------------------------------------------------------------------------------------------------------------------------------------------------------------------------------------------------------------------------------------------------------------------------------------------------------------------------------------------------------------------------------------------------------------------------------------------------------------------------------------------------------------------------------------------------------------------------------------------------------------------------------------------------------------------------------------------------------------------------------------------------------------------------------------------------------------------------------------------------------------------------------------------------------------------------------------------------------------------------------------------------------------------------------------------------------------------------------------------------|
| <b>SYSTEM-LEVEL FACTORS</b> | <b>Communication</b> | <p>Policy<br/>Government<br/>Healthcare<br/>provider<br/>Media</p> <p><i>Interviewer: How do you think the people that were making the decisions could do a better job in the future? "I guess they could be more consistent.... like they come out and say one thing and then they come out and say another thing. You know."</i><br/>[Participant 6]</p> <p>"That just speaks to leadership, again, I think it just sent so many false messages so many confusing messages." [Participant 11]</p> <p>"And I probably shouldn't say that but he's a bit of a dick. So, the thyroid doctor he showed no mercy, he showed no kindness, he was just a jackass but his assistant was amazing." [Participant 10]</p> <p>"I definitely feel like giving more notice that a surgery's going to be canceled. Less than 24 hours' notice is just not enough time for a person. I think it's more emotionally devastating to be right on the cusp of finally dealing with the situation, and having it canceled. So, I think giving a more advanced notice of cancellations would've been better." [Participant 12]</p> <p>"I did connect with the oncology clinic and they've been super about it um, but I have nothing but praise for that clinic overall in terms of how they keep you informed and stuff like that so that's been good." [Participant 1]</p> <p>"I was impressed I got a phone call right like from the doctor, which it wasn't just a like a nurse or a clinic staff or someone like that. So, it was a personal phone call and she just apologized and said there was nothing she could do, and she would get back in touch with me when she could." [Participant 5]</p> |
|-----------------------------|----------------------|----------------------------------------------------------------------------------------------------------------------------------------------------------------------------------------------------------------------------------------------------------------------------------------------------------------------------------------------------------------------------------------------------------------------------------------------------------------------------------------------------------------------------------------------------------------------------------------------------------------------------------------------------------------------------------------------------------------------------------------------------------------------------------------------------------------------------------------------------------------------------------------------------------------------------------------------------------------------------------------------------------------------------------------------------------------------------------------------------------------------------------------------------------------------------------------------------------------------------------------------------------------------------------------------------------------------------------------------------------------------------------------------------------------------------------------------------------------------------------------------------------------------------------------------------------------------------------------------------------------------------------------------------------------------------------------|

|                      |                                                                                                                                                                                                                                                                                                                                                                                                                                                                                                                                                                                                                                                                                                                                                                                                                                                                                                                                                                                                                                                                                                                                                                                                                                                                                                                                                                                                                                                                                                                                                                                                                                                                                                                                                                                                                                                                                                                                                                                                                                                                                                                                                                                    |
|----------------------|------------------------------------------------------------------------------------------------------------------------------------------------------------------------------------------------------------------------------------------------------------------------------------------------------------------------------------------------------------------------------------------------------------------------------------------------------------------------------------------------------------------------------------------------------------------------------------------------------------------------------------------------------------------------------------------------------------------------------------------------------------------------------------------------------------------------------------------------------------------------------------------------------------------------------------------------------------------------------------------------------------------------------------------------------------------------------------------------------------------------------------------------------------------------------------------------------------------------------------------------------------------------------------------------------------------------------------------------------------------------------------------------------------------------------------------------------------------------------------------------------------------------------------------------------------------------------------------------------------------------------------------------------------------------------------------------------------------------------------------------------------------------------------------------------------------------------------------------------------------------------------------------------------------------------------------------------------------------------------------------------------------------------------------------------------------------------------------------------------------------------------------------------------------------------------|
| SYSTEM-LEVEL FACTORS | <p data-bbox="367 649 441 852"><b>Accountability/<br/>Responsibility</b></p> <p data-bbox="504 194 703 535">Understanding Frustration<br/>Anger<br/>Communication<br/>Vaccination<br/>Public policy<br/>Government<br/>Healthcare system</p> <p data-bbox="745 194 1890 1315"> "Overall, this is a massive public policy failure." [Participant 3]<br/><br/> "Well, I mean, I understand that they had to maintain space in the health care system for COVID patients. And be able to create more ICU space, as is necessary, so I totally understand the rationale and thankfully I'm not speaking from the perspective of, say, a brain cancer patient where getting that surgery done now is so so important. I think my perspective would be different if that were the case, but my surgery was one that could afford to be delayed and I recognize the need for it to have been based on having to keep beds available for those covid patients." [Participant 4]<br/><br/> "I wish that things with regards to the pandemic had been handled much differently so that potentially patients and the hospital staff wouldn't have been put in this situation." [Participant 5]<br/><br/> "I'm disappointed, but also understanding. Like, I understand the reason needed for it, I understand why the hospitals are not doing surgeries right now. I don't hold ill will to the health care system." [Participant 8]<br/><br/> <i>Interviewer: Did you think there was alternate options, maybe like something else, they could have done in your eyes. "I think more restrictions earlier on work definitely an alternative." [Participant 8]</i><br/><br/> "Our health care system is suffering, and I feel like the people that are making these decisions might be prioritizing social aspects before medical ones." [Participant 8]<br/><br/> "In my particular surgery, the chances of going to ICU after surgery were nil, very small. And so, I feel like my surgery could have been done, without adding to the ICU problem of being overcrowded. So, I think some of the surgeries that, in a limited quantity, should still have been done." [Participant 12] </p> |
|----------------------|------------------------------------------------------------------------------------------------------------------------------------------------------------------------------------------------------------------------------------------------------------------------------------------------------------------------------------------------------------------------------------------------------------------------------------------------------------------------------------------------------------------------------------------------------------------------------------------------------------------------------------------------------------------------------------------------------------------------------------------------------------------------------------------------------------------------------------------------------------------------------------------------------------------------------------------------------------------------------------------------------------------------------------------------------------------------------------------------------------------------------------------------------------------------------------------------------------------------------------------------------------------------------------------------------------------------------------------------------------------------------------------------------------------------------------------------------------------------------------------------------------------------------------------------------------------------------------------------------------------------------------------------------------------------------------------------------------------------------------------------------------------------------------------------------------------------------------------------------------------------------------------------------------------------------------------------------------------------------------------------------------------------------------------------------------------------------------------------------------------------------------------------------------------------------------|

1  
2  
3  
4  
5  
6  
7  
8  
9  
10  
11  
12  
13  
14  
15  
16  
17  
18  
19  
20  
21  
22  
23  
24  
25  
26  
27  
28  
29  
30  
31  
32  
33  
34  
35  
36  
37  
38  
39  
40  
41  
42  
43  
44  
45  
46  
47

|                       |                                                                                                                                                                                                                                                                                                                                                                                                                                                                                                                                                                                                                                                                                                                                                                                                                                                                                                                                                                                                                                                                                                                                                                                                                                                                                                                                                                                                                                                                                                                                                                                                                           |
|-----------------------|---------------------------------------------------------------------------------------------------------------------------------------------------------------------------------------------------------------------------------------------------------------------------------------------------------------------------------------------------------------------------------------------------------------------------------------------------------------------------------------------------------------------------------------------------------------------------------------------------------------------------------------------------------------------------------------------------------------------------------------------------------------------------------------------------------------------------------------------------------------------------------------------------------------------------------------------------------------------------------------------------------------------------------------------------------------------------------------------------------------------------------------------------------------------------------------------------------------------------------------------------------------------------------------------------------------------------------------------------------------------------------------------------------------------------------------------------------------------------------------------------------------------------------------------------------------------------------------------------------------------------|
| COVID-RELATED IMPACTS | <p>Isolation<br/>Uncertainty<br/>Healthcare<br/>access<br/>Vaccine</p> <p>“Um, I think in terms of logistics it's just been a more of a preventative, just kind of keeping myself on the safe side at this point in terms of perhaps being a higher risk or maybe that are vaccine didn't quite give me enough of the boost that I needed or anything like that. But, you know better safe than sorry at this point.” [Participant 1]</p> <p>“Yeah and like I'd already been isolating for like two weeks because like if you get; if you show up at the hospital with the sniffles we're canceling your surgery. Right. Which is very reasonable. But then it's like cool I'm locked down for two weeks. Um and then it was like, a week out it got canceled. That was a week of locking down that was kind of wasted.” [Participant 3]</p> <p>“Yeah, obviously with COVID I'm not really going out and socializing so that has been affected.” [Participant 14]</p> <p>“Well, COVID in general has affected the ability to socialize. And the fact that if I'm going to be going into surgery, I can't take any chance of catching COVID, so socialization is nothing. It's not there, because you can't take that chance, because surgery might be around the corner. And you can't chance possibly being sick and it being canceled.” [Participant 12]</p> <p>“There have been times that I've thought of about going in, even going into the doctor and stuff. And I've been hesitant about doing it...Because of going in, it feels like you're walking into a germ factory maybe, right now.” [Participant 12]</p> |
|-----------------------|---------------------------------------------------------------------------------------------------------------------------------------------------------------------------------------------------------------------------------------------------------------------------------------------------------------------------------------------------------------------------------------------------------------------------------------------------------------------------------------------------------------------------------------------------------------------------------------------------------------------------------------------------------------------------------------------------------------------------------------------------------------------------------------------------------------------------------------------------------------------------------------------------------------------------------------------------------------------------------------------------------------------------------------------------------------------------------------------------------------------------------------------------------------------------------------------------------------------------------------------------------------------------------------------------------------------------------------------------------------------------------------------------------------------------------------------------------------------------------------------------------------------------------------------------------------------------------------------------------------------------|

|             |                 |                                                                                             |
|-------------|-----------------|---------------------------------------------------------------------------------------------|
| UNCERTAINTY | Worry           | “...anguish and uncertainty and whatever because of the lack of communication, no           |
|             | Anxiety         | answers and no timeline well unfortunately it's well, you could die before you get your     |
|             | Quality of life | knee replacement right.” [Participant 7A]                                                   |
|             | Physical health |                                                                                             |
|             | Plan for future |                                                                                             |
|             |                 | “Even the facts of like if I was going to go somewhere, right, I would love to make all     |
|             |                 | these plans, but I can't because I don't know if I can speak and I don't know if I can; I   |
|             |                 | don't know if I can make any kind of future plans, because I'm like oh, I have to wait for  |
|             |                 | surgery.” [Participant 10]                                                                  |
|             |                 |                                                                                             |
|             |                 |                                                                                             |
|             |                 | “It delays everything it puts absolutely everything on hold. I think when I mentioned a     |
|             |                 | cumulative effect for me. Before the march 31, 2021 surgery which was the reversal.         |
|             |                 | That had been postponed so, then I was postponed for November, scheduled for March          |
|             |                 | 31. We are holding on by a thread in our home to see if I'm even going to get in. Or if     |
|             |                 | things are going to be cancel because we watch the numbers; everyone's watching the         |
|             |                 | numbers.” [Participant 11]                                                                  |
|             |                 |                                                                                             |
|             |                 |                                                                                             |
|             |                 | “I'm at their mercy basically of when, when they'll get me back in. And just not really     |
|             |                 | being given any sort of alternative option. I mean I don't know what that would look        |
|             |                 | like, or what I even expect but yeah you just kind of feel very left in the dark.”          |
|             |                 | [Participant 9]                                                                             |
|             |                 |                                                                                             |
|             |                 |                                                                                             |
|             |                 | “...loss of control and all of those unknowns it's just hard to comprehend, and I guess     |
|             |                 | just yeah plan for your future because I have no idea. So even just like on a mental        |
|             |                 | health toll it's ,it's impacted my day to day and wanting to make plans” [Participant 9]    |
|             |                 |                                                                                             |
|             |                 |                                                                                             |
|             |                 | “It would definitely be to just have that date in mind and just be able to mentally         |
|             |                 | prepare for it. So, it was difficult to not have a date and to just be kind of in limbo and |
|             |                 | waiting and not knowing both personally and professionally how that was going to be         |
|             |                 | affecting things in my life.” [Participant 4]                                               |
|             |                 |                                                                                             |
|             |                 |                                                                                             |

1  
2  
3  
4  
5  
6  
7  
8  
9  
10  
11  
12  
13  
14  
15  
16  
17  
18  
19  
20  
21  
22  
23  
24  
25  
26  
27  
28  
29  
30  
31  
32  
33  
34  
35  
36  
37  
38  
39  
40  
41  
42  
43  
44  
45  
46  
47  
48  
49  
50  
51  
52  
53  
54  
55  
56  
57  
58  
59  
60

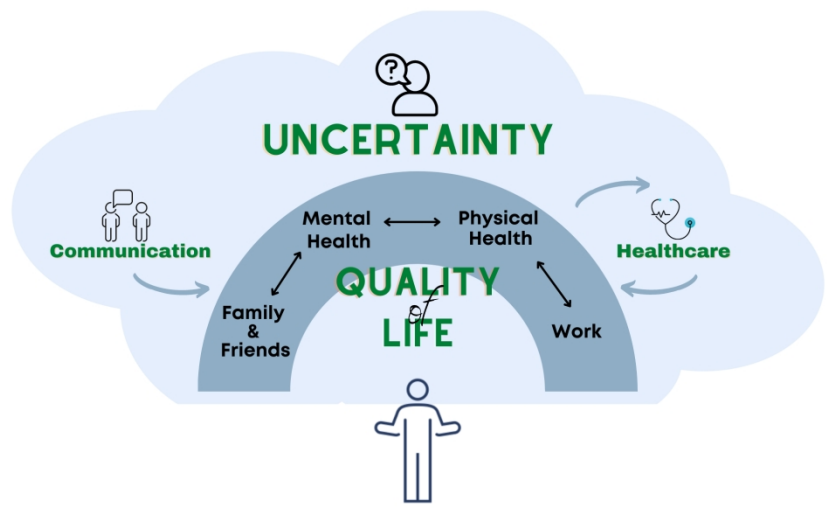

Figure 2. The identified themes are interconnected.

1540x1155mm (38 x 38 DPI)

### Semi-Structured Interview Guide

Thank-you for taking the time to participate in this interview to help us understand the impact of delaying non-urgent surgeries on patients. My name is {insert name}, I am a {insert role}. The primary investigator is Dr. Khara Sauro.

You have been invited here today because we are interested in hearing your experience as a patient who had a planned surgery delayed during the COVID-19 pandemic response. We will ask for your experience and ask a few questions about the type of surgery you were planning to have, how that affected your health and everyday life.

Thank you again for your participation.

Before we begin, I would like to make sure that you know that there are no right or wrong answers in our discussion today; we are interested in all comments. We don't want to miss any of your comments and feedback, so we are taking detailed notes and audio recording our conversation.

Please be assured what is said and discussed today will be kept confidential and any information you provide will be kept in a password protected folder on a secure server, accessible only by members of the research team. As is noted in the informed consent, your participation is voluntary and you are free to decline participation at any point should you wish to do so for any reason. Please let me know if you have any questions.

Do you have any questions before we begin?

1. Please describe the surgery you were booked to have, as you understand it.
2. When were you scheduled to have your surgery and do you have a new date for your surgery?
3. Is this the first time your surgery is being re-scheduled?
4. Can you please tell us about how having your surgery delayed has affected your overall health?  
Prompts:
  - a. How has your healthy been since your surgery was delayed?
  - b. What about your mental health?
  - c. How have you interacted with your healthcare provider(s)? Is that different than before you were supposed to have surgery?
  - d. Have you had to visit the emergency room or hospital while you were waiting for your surgery? Can you tell me about that?
5. Can you please tell us about how having your surgery delayed has affected your everyday life, such as activities of daily living, work, income, socialization, family, relationships?

Ethics ID: REB20-0753

Study Title: Surgery during COVID-19: Impact to Rebuilding Capacity

PI: Khara Sauro

Version number/date: V1/May 21, 2020

Page 1 of 2

For Peer Review Only

1  
2  
3  
4 \*Ask this only if they haven't touched on this question in their response to the previous  
5 question.

6 Prompts:

- 7 a. Have you had to change many aspects of your daily living because your surgery was  
8 delayed? Can you tell me more about that?  
9 b. Have you had to ask for more help from family or a caregiver? Can you expand on that?  
10 c. Have you been able to do the things you normally would do?  
11

12 What do you think about the decision to delay surgeries?

13 Prompts:

- 14 a. Was the right thing to do given the circumstances?  
15 b. What do you think the alternate options were?  
16 c. How could the people making the decisions do a better job in the future?  
17 d. What do you think was done really well?  
18  
19

20 I would just like to take a moment and summarize what we've talked about today. <Summarize key  
21 points>.  
22

23 Do you have anything else to add that we may not have captured?  
24  
25

26 Thank you so much for speaking with me today and for providing your experiences.  
27  
28  
29  
30  
31  
32  
33  
34  
35  
36  
37  
38  
39  
40  
41  
42  
43  
44  
45  
46  
47  
48  
49  
50  
51  
52  
53  
54

55 Ethics ID: REB20-0753

56 Study Title: Surgery during COVID-19: Impact to Rebuilding Capacity

57 PI: Khara Sauro

58 Version number/date: V1/May 21, 2020

59 Page 2 of 2

60 For Peer Review Only



## COREQ (COnsolidated criteria for REporting Qualitative research) Checklist

A checklist of items that should be included in reports of qualitative research. You must report the page number in your manuscript where you consider each of the items listed in this checklist. If you have not included this information, either revise your manuscript accordingly before submitting or note N/A.

| Topic                                          | Item No. | Guide Questions/Description                                                                                                                              | Reported on Page No. |
|------------------------------------------------|----------|----------------------------------------------------------------------------------------------------------------------------------------------------------|----------------------|
| <b>Domain 1: Research team and reflexivity</b> |          |                                                                                                                                                          |                      |
| <i>Personal characteristics</i>                |          |                                                                                                                                                          |                      |
| Interviewer/facilitator                        | 1        | Which author/s conducted the interview or focus group?                                                                                                   |                      |
| Credentials                                    | 2        | What were the researcher's credentials? E.g. PhD, MD                                                                                                     |                      |
| Occupation                                     | 3        | What was their occupation at the time of the study?                                                                                                      |                      |
| Gender                                         | 4        | Was the researcher male or female?                                                                                                                       |                      |
| Experience and training                        | 5        | What experience or training did the researcher have?                                                                                                     |                      |
| <i>Relationship with participants</i>          |          |                                                                                                                                                          |                      |
| Relationship established                       | 6        | Was a relationship established prior to study commencement?                                                                                              |                      |
| Participant knowledge of the interviewer       | 7        | What did the participants know about the researcher? e.g. personal goals, reasons for doing the research                                                 |                      |
| Interviewer characteristics                    | 8        | What characteristics were reported about the interviewer/facilitator? e.g. Bias, assumptions, reasons and interests in the research topic                |                      |
| <b>Domain 2: Study design</b>                  |          |                                                                                                                                                          |                      |
| <i>Theoretical framework</i>                   |          |                                                                                                                                                          |                      |
| Methodological orientation and Theory          | 9        | What methodological orientation was stated to underpin the study? e.g. grounded theory, discourse analysis, ethnography, phenomenology, content analysis |                      |
| <i>Participant selection</i>                   |          |                                                                                                                                                          |                      |
| Sampling                                       | 10       | How were participants selected? e.g. purposive, convenience, consecutive, snowball                                                                       |                      |
| Method of approach                             | 11       | How were participants approached? e.g. face-to-face, telephone, mail, email                                                                              |                      |
| Sample size                                    | 12       | How many participants were in the study?                                                                                                                 |                      |
| Non-participation                              | 13       | How many people refused to participate or dropped out? Reasons?                                                                                          |                      |
| <i>Setting</i>                                 |          |                                                                                                                                                          |                      |
| Setting of data collection                     | 14       | Where was the data collected? e.g. home, clinic, workplace                                                                                               |                      |
| Presence of non-participants                   | 15       | Was anyone else present besides the participants and researchers?                                                                                        |                      |
| Description of sample                          | 16       | What are the important characteristics of the sample? e.g. demographic data, date                                                                        |                      |
| <i>Data collection</i>                         |          |                                                                                                                                                          |                      |
| Interview guide                                | 17       | Were questions, prompts, guides provided by the authors? Was it pilot tested?                                                                            |                      |
| Repeat interviews                              | 18       | Were repeat interviews carried out? If yes, how many?                                                                                                    |                      |
| Audio/visual recording                         | 19       | Did the research use audio or visual recording to collect the data?                                                                                      |                      |
| Field notes                                    | 20       | Were field notes made during and/or after the interview or focus group?                                                                                  |                      |
| Duration                                       | 21       | What was the duration of the interviews or focus group?                                                                                                  |                      |
| Data saturation                                | 22       | Was data saturation discussed?                                                                                                                           |                      |
| Transcripts returned                           | 23       | Were transcripts returned to participants for comment and/or                                                                                             |                      |

| Topic                                  | Item No. | Guide Questions/Description                                                                                                        | Reported on Page No. |
|----------------------------------------|----------|------------------------------------------------------------------------------------------------------------------------------------|----------------------|
|                                        |          | correction?                                                                                                                        |                      |
| <b>Domain 3: analysis and findings</b> |          |                                                                                                                                    |                      |
| <i>Data analysis</i>                   |          |                                                                                                                                    |                      |
| Number of data coders                  | 24       | How many data coders coded the data?                                                                                               |                      |
| Description of the coding tree         | 25       | Did authors provide a description of the coding tree?                                                                              |                      |
| Derivation of themes                   | 26       | Were themes identified in advance or derived from the data?                                                                        |                      |
| Software                               | 27       | What software, if applicable, was used to manage the data?                                                                         |                      |
| Participant checking                   | 28       | Did participants provide feedback on the findings?                                                                                 |                      |
| <i>Reporting</i>                       |          |                                                                                                                                    |                      |
| Quotations presented                   | 29       | Were participant quotations presented to illustrate the themes/findings?<br>Was each quotation identified? e.g. participant number |                      |
| Data and findings consistent           | 30       | Was there consistency between the data presented and the findings?                                                                 |                      |
| Clarity of major themes                | 31       | Were major themes clearly presented in the findings?                                                                               |                      |
| Clarity of minor themes                | 32       | Is there a description of diverse cases or discussion of minor themes?                                                             |                      |

Developed from: Tong A, Sainsbury P, Craig J. Consolidated criteria for reporting qualitative research (COREQ): a 32-item checklist for interviews and focus groups. *International Journal for Quality in Health Care*. 2007. Volume 19, Number 6: pp. 349 – 357

**Once you have completed this checklist, please save a copy and upload it as part of your submission. DO NOT include this checklist as part of the main manuscript document. It must be uploaded as a separate file.**
